# Supplementary material for: KDM2B regulates hippocampal morphogenesis by transcriptionally silencing Wnt signaling in neural progenitors
Source: PubMed Central journal article supplement (PMC10576813; doi:10.1038/s41467-023-42322-2), 2023-10-14
Supplement: 41467_2023_42322_MOESM1_ESM.pdf [file 41467_2023_42322_MOESM1_ESM.pdf]

1 **KDM2B regulates hippocampal morphogenesis by transcriptionally**  
2 **silencing Wnt signaling in neural progenitors**

3

4 **Supplementary Information**

5 Supplementary information contains 11 supplementary Figures, 4  
6 supplementary tables, supplementary methods, source data and  
7 supplementary references.

8

9 **Supplementary Figures**

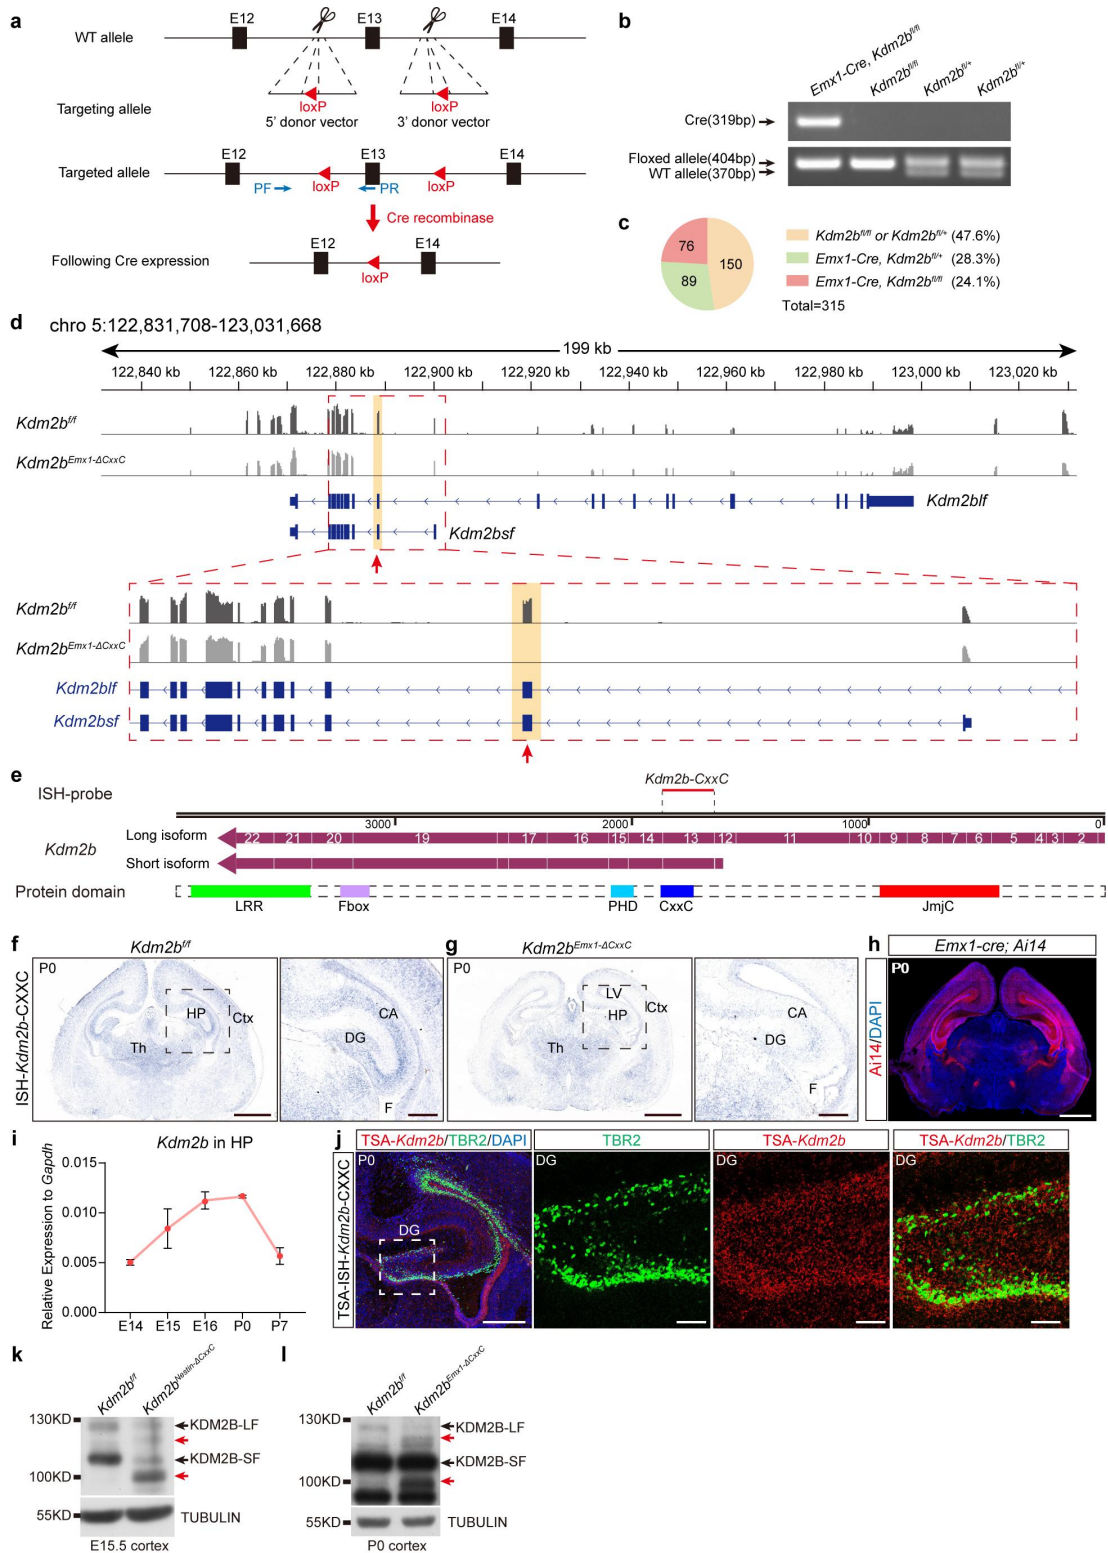

Supplementary Figure 1

Supplementary Fig. 1: Selective ablation of the KDM2B-CxxC in the developing *Kdm2b<sup>Emx1-ΔCxxC</sup>* hippocampi.

a Schematic representation of the *Kdm2b* genomic structure (top), targeting allele (middle) and targeted allele (bottom). Exon 13 is flanked by two *loxP*

15 sites and will be excised after mating with Cre-recombinase-expressing mice.  
16 Floxed genotype primers (PF and PR) were marked with blue arrows.  
17 **b** PCR products for respective genotypes. Uncropped blots in Source data.  
18 **c** Offspring distribution of indicated genotypes at P0 from *Kdm2b<sup>fl/fl</sup>* females  
19 crossing with *Emx1-Cre; Kdm2b<sup>fl/+</sup>* males.  
20 **d** RNA-seq track of P0 control and *Kdm2b<sup>Emx1-ΔCxxC</sup>* hippocampal  
21 neurospheres showed deletion of exon 13 (the red arrow).  
22 **e** Schematic diagram of *Kdm2b* transcripts and corresponding protein domains.  
23 Positions of the ISH probe was indicated.  
24 **f, g** Representative ISH images showing *Kdm2b* expression in coronal  
25 sections of P0 control (**f**) and *Kdm2b<sup>Emx1-ΔCxxC</sup>* (**g**) brains. Hippocampi (HP)  
26 were enlarged on the right.  
27 **h** Representative immunofluorescent image of P0 *Emx1-cre;Ai14* brain. Nuclei  
28 were labeled with DAPI (blue).  
29 **i** Relative expression of *Kdm2b* in hippocampus at different stages of  
30 development.  
31 **j** Representative ISH-fluorescence staining of *Kdm2b* and  
32 immunofluorescence co-staining of TBR2 in the coronal section of P0 wild-type  
33 mouse brains. Boxed regions of DG were enlarged on the right.  
34 **k, l** Immunoblots of KDM2B and TUBULIN using extracts of E15.5 control and  
35 *Kdm2b<sup>Nestin-ΔCxxC</sup>* neocortices (**k**), and P0 control and *Kdm2b<sup>Emx1-ΔCxxC</sup>*  
36 neocortices (**l**). Black arrows indicated wild-type KDM2B, whereas red arrows  
37 indicated CxxC-ZF deleted KDM2B. Uncropped blots in Source data.  
38 Scale bars, 1mm (**f, g** left, **h**), 300 μm (**f, g** right, **j** left), 50 μm (**j** right). HP,  
39 Hippocampus; Ctx, cortex; Th, Thalamus; CA, Cornu Ammonis; DG, dentate  
40 gyrus; LV, lateral ventricle; F, fimbria.  
41

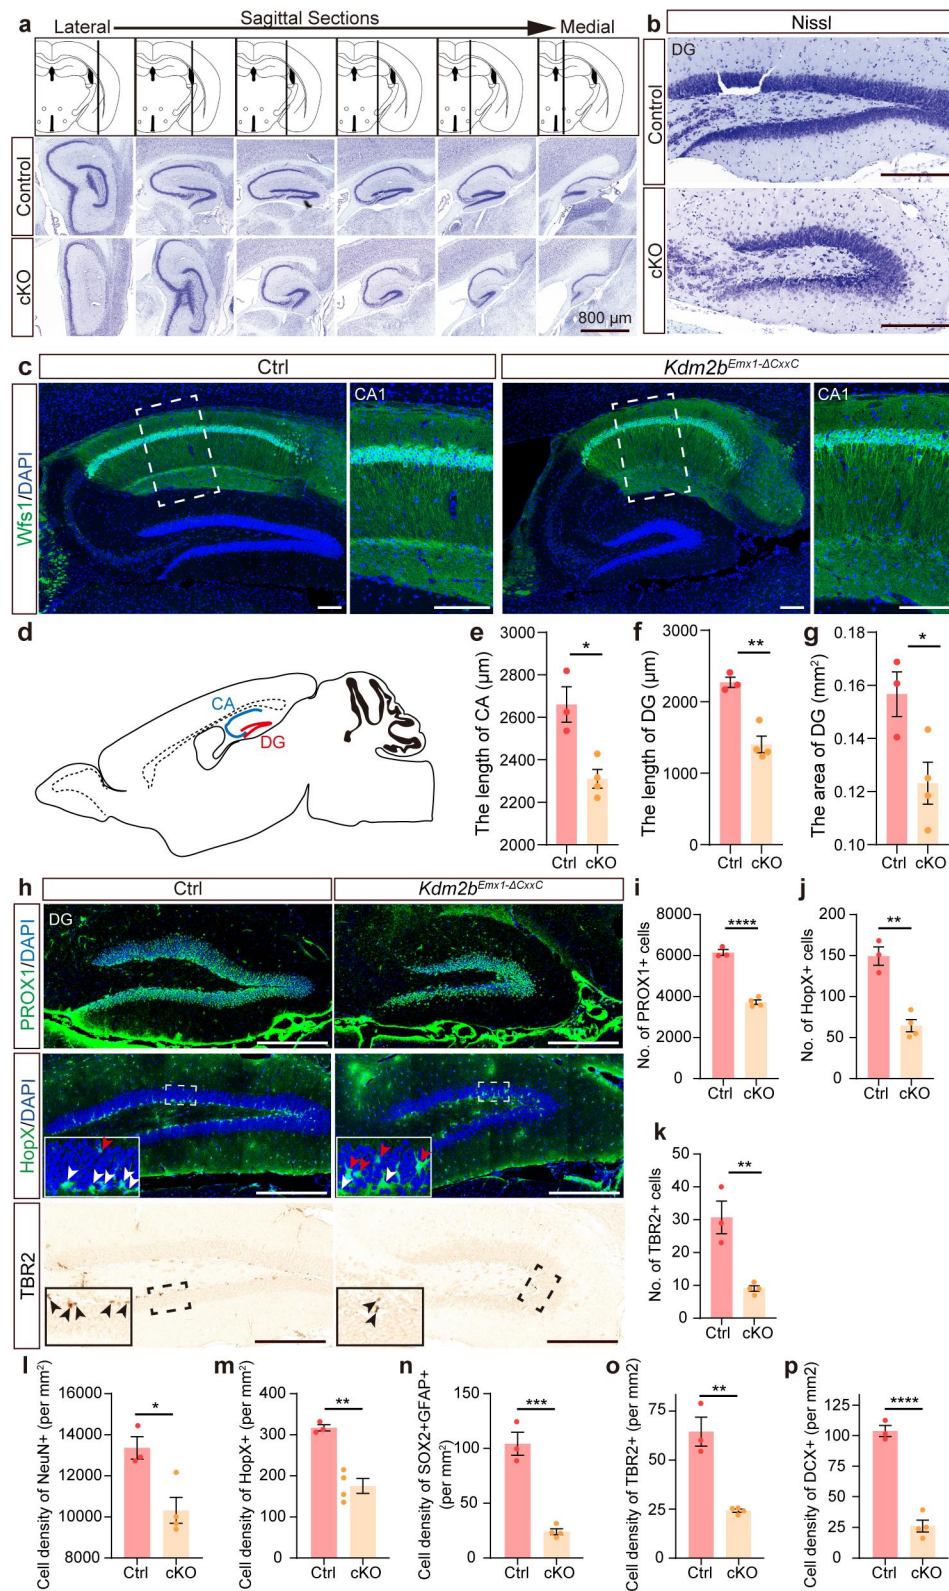

## Supplementary Figure 2

**Supplementary Fig. 2. Deletion of the KDM2B-CxxC causes hippocampal hypoplasia.**

**a** Nissl staining of sagittal sections of adult control and *Kdm2b<sup>Emx1-ΔCxxC</sup>*

46 hippocampi. Sections from lateral to medial were displayed sequentially from  
47 left to right, with relative positions shown as black lines on the first line.

48 **b** Nissl staining on sagittal sections of adult control (left) and *Kdm2b*<sup>Emx1-ΔCxxC</sup>  
49 (right) DGs.

50 **c** Immunofluorescent (IF) staining of Wfs1 on sagittal sections of adult control  
51 (left) and *Kdm2b*<sup>Emx1-ΔCxxC</sup> (right) hippocampi. Nuclei were labeled with DAPI  
52 (blue). Boxed regions of CA1 were enlarged on the right.

53 **d** The schematic diagram of a sagittal section of adult brain. The DG and CA  
54 regions were marked by red and blue lines, respectively.

55 **e-g** Quantifications of the length of CA (**e**), the length of DG (**f**), and the area of  
56 DG (**g**) in adult control and *Kdm2b*<sup>Emx1-ΔCxxC</sup> brain.

57 **h** From top to bottom: IF staining for PROX1, IF for HopX and IHC for TBR2,  
58 on sagittal sections of adult control (left) and *Kdm2b*<sup>Emx1-ΔCxxC</sup> (right) DGs.  
59 Boxed regions of SGZ were enlarged on the left-bottom corners. Boxed  
60 regions were enlarged on bottom-left corners. White and red arrows denote  
61 HopX+ signals in the subgranule zone (SGZ) and granule cell layer  
62 respectively.

63 **i-k** Quantification of the number of PROX1+ cells (**i**), HopX+ cells (**j**) and DCX+  
64 cells (**k**) in the DG.

65 **l-p** Quantification of the density of NeuN+ cells in the DG (**l**), HopX+ cells in  
66 the SGZ (**m**) and SOX2+GFAP+ cells in the SGZ (**n**), TBR2+ cells in the SGZ  
67 (**o**), DCX+ cells in the DG (**p**).

68 n = 3 for control brains and n = 4 for *Kdm2b*<sup>Emx1-ΔCxxC</sup> brains in (**e-g**, **i-p**). Data  
69 are represented as means ± SEM. Statistical significance was determined  
70 using an unpaired two-tailed Student's t-test (**e-g**, **i-p**). \*P < 0.05, \*\*P < 0.01,  
71 \*\*\*P < 0.001, and \*\*\*\*P < 0.0001. Scale bars, 800 μm (**a**), 200 μm (**b**, **h**), 100  
72 μm (**c**).

73

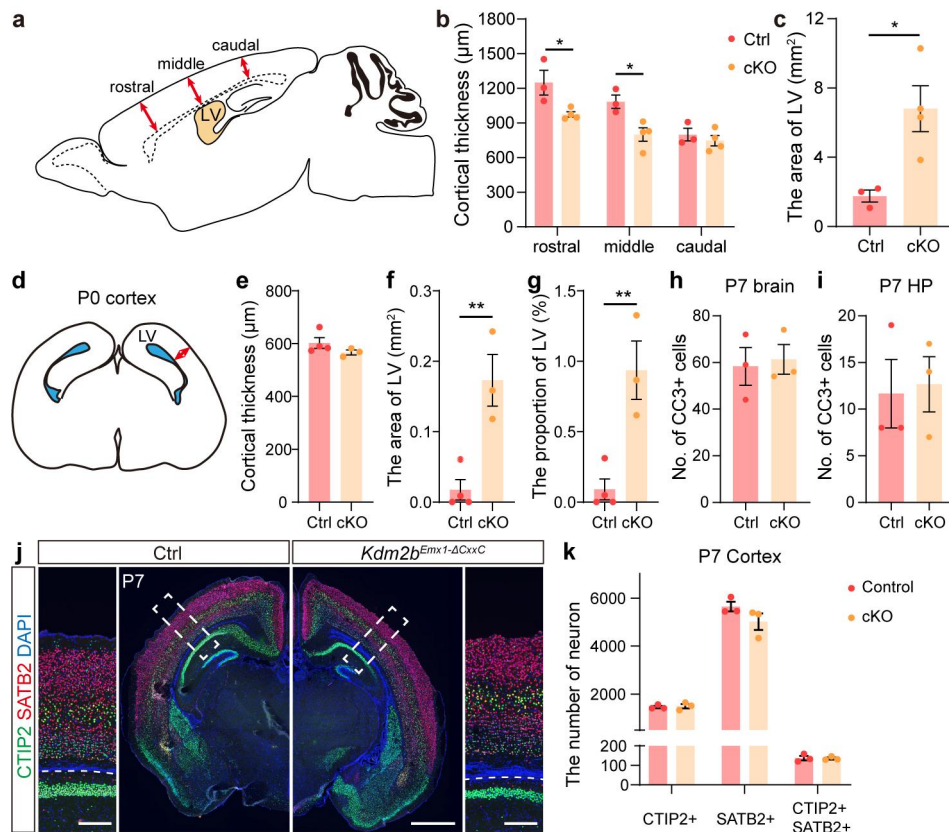

**Supplementary Figure 3**

**Supplementary Fig. 3. Neocortical development was unaffected on conditional loss of KDM2B-CxxC.**

**a** The schematic diagram of a sagittal section of adult brain. Red bidirectional arrows show the rostral, middle, and caudal regions of the neocortex.

**b** Quantifications of neocortical thickness of adult control and *Kdm2b<sup>Emx1-ΔCxxC</sup>* brains in rostral, middle, and caudal regions.

**c** Quantifications of the area of lateral ventricle in adult control and *Kdm2b<sup>Emx1-ΔCxxC</sup>* brain. n = 3 for control brains and n = 4 for *Kdm2b<sup>Emx1-ΔCxxC</sup>* brains.

**d** The diagram of a coronal section of P0 brain. The red bidirectional arrow indicates neocortical thickness. The blue areas indicate the lateral ventricles (LV).

**e-g** Quantifications of neocortical thickness (**e**), area of lateral ventricles (LV, **f**) and the area proportion of LV (**g**) in P0 control and *Kdm2b<sup>Emx1-ΔCxxC</sup>* brains. n = 4 for control brains and n = 3 for *Kdm2b<sup>Emx1-ΔCxxC</sup>* brains.

90 **h-i** Quantifications of cleaved Caspase3 (CC3) labeled apoptotic cells in the  
91 coronal section (**h**) and HP region (**i**) of P7 brain.

92 **j** IF staining for CTIP2 (green) and SATB2 (red) on coronal sections of P7  
93 control (left) and *Kdm2b*<sup>Emx1-ΔCxxC</sup> (right) mice. Nuclei were labeled with DAPI  
94 (blue). Boxed regions were enlarged on the right.

95 **k** Quantification of CTIP2+, SATB2+ and CTIP2+SATB2+ cells in P7 cortex (**j**).  
96 n = 3 for control brains and n = 3 for *Kdm2b*<sup>Emx1-ΔCxxC</sup> brains.

97 Data are represented as means ± SEM. Statistical significance was  
98 determined using two-way ANOVA followed by Sidak's multiple comparisons  
99 test (**b**, **k**), or using an unpaired two-tailed Student's t-test (**c**, **e-i**). \*P < 0.05,  
100 \*\*P < 0.01. Scale bars, 1 mm (**j**, whole brain), 200 μm (**j**, cortex). LV, lateral  
101 ventricles.  
102

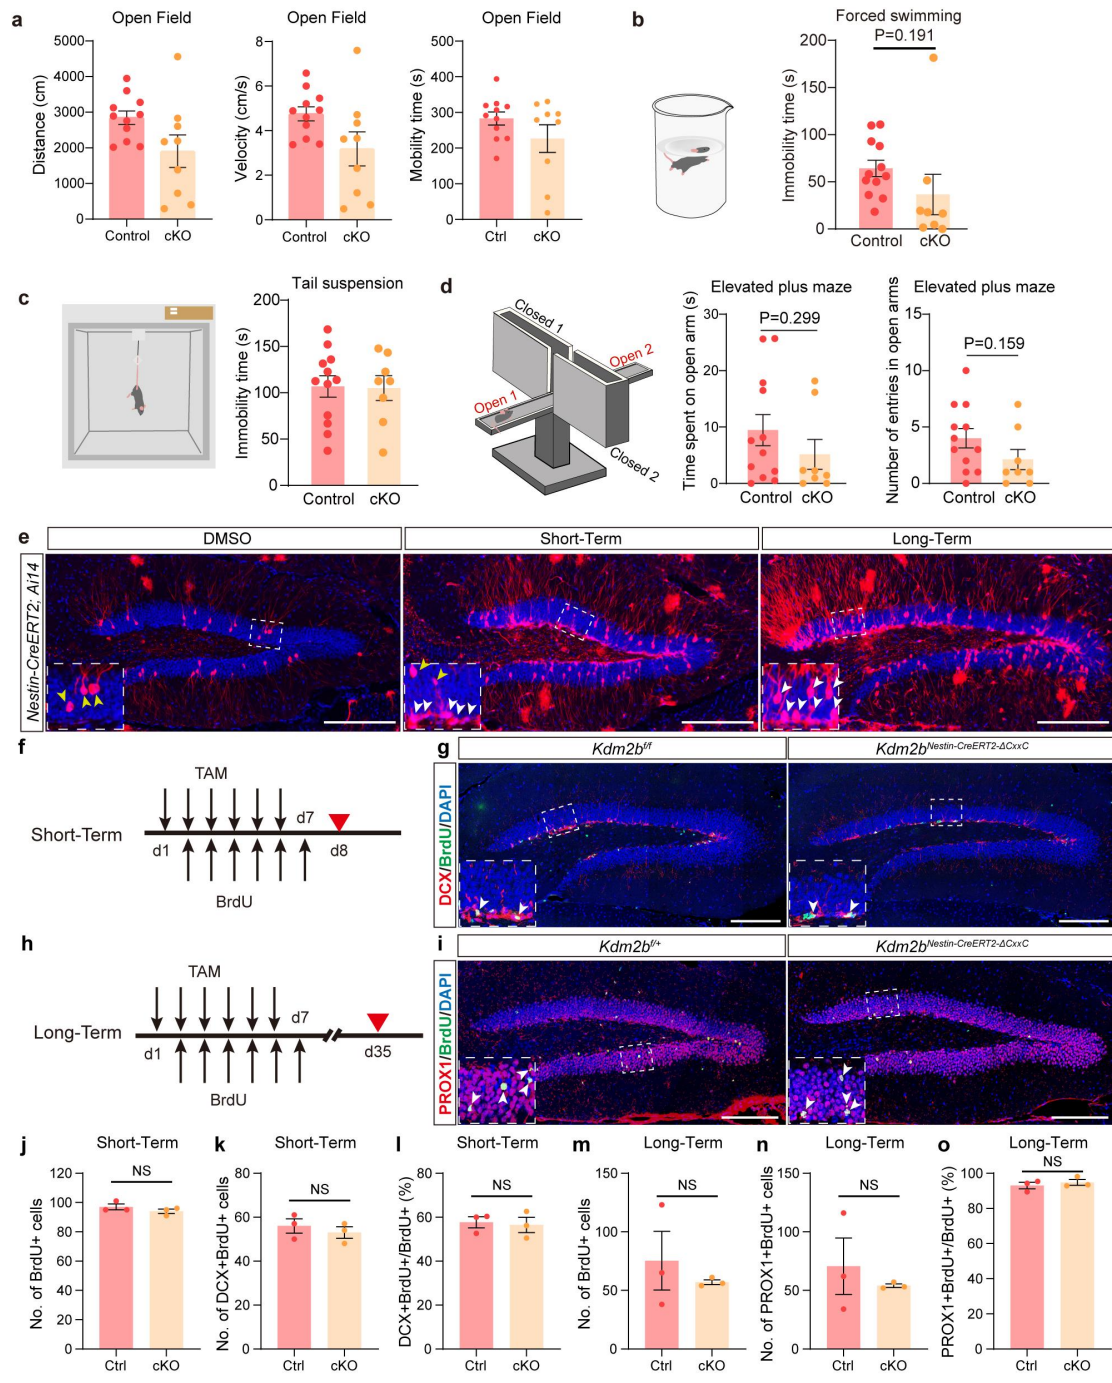

**Supplementary Figure 4**

**Supplementary Fig. 4. SGZ neurogenesis was unaffected on ablation of KDM2B-CxxC at the adult stage.**

**a** Quantification of distance, velocity, and mobility time in the open-field test.

**b, c** Immobility time in forced swimming (**b**) and tail suspension experiments (**c**).

**d** Time spent in open arms and the number of entries in open arms in elevated



110 plus maze test.

111 **e** Representative IF images showing DG region of *Nestin-CreERT2; Ai14* mice  
112 intraperitoneal injected with DMSO, short-term TAM and long-term TAM.  
113 Nuclei were labeled with DAPI (blue). Boxed regions were enlarged on  
114 bottom-left corners. White arrows denote Nestin+ cells and their progeny in  
115 DG.

116 **f, h** Eight-week-old mice (*Kdm2b<sup>ff</sup>* or *Kdm2b<sup>f/+</sup>*, and *Kdm2b<sup>Nestin-CreERT2-ΔCxxC</sup>*)  
117 were intraperitoneally injected with TAM and BrdU for 6 consecutive days  
118 (BrdU injection delayed by 1 day). Mice were sacrificed either 1 day later (**f**,  
119 Short-Term) or 4 weeks later (**h**, Long-Term).

120 **g** Representative IF images showing DG sections stained with DCX (red) and  
121 BrdU (green). Nuclei were labeled with DAPI (blue). Boxed regions were  
122 enlarged on bottom-left corners. White arrows denote DCX+BrdU+ cells in DG.

123 **i** Representative IF images showing DG sections stained with PROX1 (red)  
124 and BrdU (green). Nuclei were labeled with DAPI (blue). Boxed regions were  
125 enlarged on bottom-left corners. White arrows denote PROX1+BrdU+ cells in  
126 DG.

127 **j-l** Quantification of numbers of BrdU+ cells (**j**), DCX+BrdU+ cells (**k**), and the  
128 proportion of DCX+BrdU+/BrdU+ (**l**) in Short-Term experiments.

129 **m-o** Quantification of numbers of BrdU+ cells (**m**), PROX1+BrdU+ cells (**n**),  
130 and the proportion of PROX1+BrdU+/BrdU+ (**o**) in Long-Term experiments.

131 In (**a**), n = 11 mice for control and n = 9 mice for *Kdm2b<sup>Emx1-ΔCxxC</sup>*. In (**b-d**), n =  
132 12 mice for control and n = 8 mice for *Kdm2b<sup>Emx1-ΔCxxC</sup>*. In (**f-o**), n = 3 mice for  
133 both control and for *Kdm2b<sup>Nestin-CreERT2-ΔCxxC</sup>*. Data are represented as means ±  
134 SEM. Statistical significance was determined using an unpaired two-tailed  
135 Student's t-test (**a-d, j-o**). Scale bars, 200 μm (**e, g, i**).

136

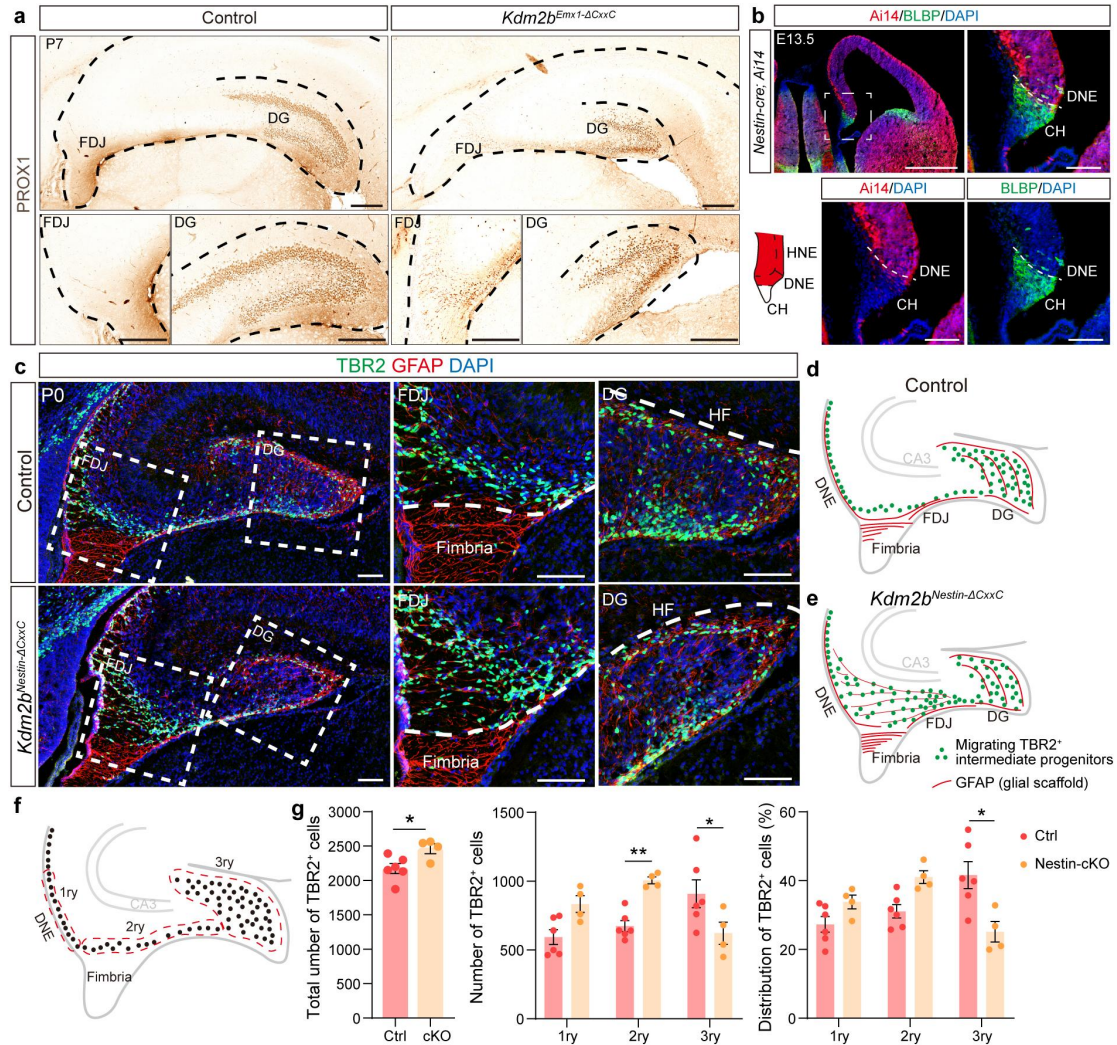

**Supplementary Figure 5**

137

138 **Supplementary Fig. 5. Ablation of the KDM2B-CxxC blocked the**  
 139 **migration of intermediate progenitors and neurogenesis of granule cells.**

140 **a** Immunohistochemical staining for PROX1 on coronal sections of P7 control  
 141 (left) and *Kdm2b<sup>Emx1-ΔCxxC</sup>* (right) hippocampi. The DG and FDJ regions were  
 142 individually enlarged underneath.

143 **b** IF staining for BLBP (green) on E13.5 *Nestin-cre;Ai14* brain sections. Nuclei  
 144 were labeled with DAPI (blue). Boxed regions are enlarged and single channel  
 145 fluorescence staining of Ai14 (tdTomato) and BLBP were shown respectively.  
 146 Dashed lines separate DNE and CH. The schematic diagram of Nestin  
 147 expression is shown at the bottom left.

148 **c** Double immunofluorescence of TBR2 (green) and GFAP (red) on P0  
 149 wild-type and *Kdm2b<sup>Nestin-ΔCxxC</sup>* hippocampi. Nuclei were labeled with DAPI

150 (blue). Boxed regions of FDJ and DG were enlarged on the right.

151 **d, e** The schematic of P0 control and *Kdm2b*<sup>Nestin-ΔCxxC</sup> hippocampi. Green dots  
152 represent migrating TBR2+ intermediate progenitors, and red lines represent  
153 GFAP+ glial scaffold.

154 **f, g** Distribution of TBR2+ cells along the three matrices, where dashed lines  
155 indicate areas considered as the 1ry, 2ry, and 3ry matrix (**f**).

156 Cartoons in **d, e** and **f** are adapted from Caramello *et al.*<sup>1</sup>. n = 6 for control  
157 brains and n = 4 for *Kdm2b*<sup>Nestin-ΔCxxC</sup> brains. Data are represented as means ±  
158 SEM. Statistical significance was determined using an unpaired two-tailed  
159 Student's t-test (**g** left), or using two-way ANOVA followed by Sidak's multiple  
160 comparisons test (**g** middle and right). \*P < 0.05, \*\*P < 0.01. Scale bars, 200  
161 μm (**a**), 500 μm (**b**, upper-left), 100 μm (**a** enlarged box regions, **c**). DG,  
162 dentate gyrus; DMS, dentate migratory stream; FDJ, fimbriodentate junction;  
163 HF, hippocampal fissure; 1ry, primary matrix; 2ry, secondary matrix; 3ry,  
164 tertiary matrix; CH, cortical hem; HNE, hippocampal neuroepithelium; DNE,  
165 dentate neuroepithelium.

166

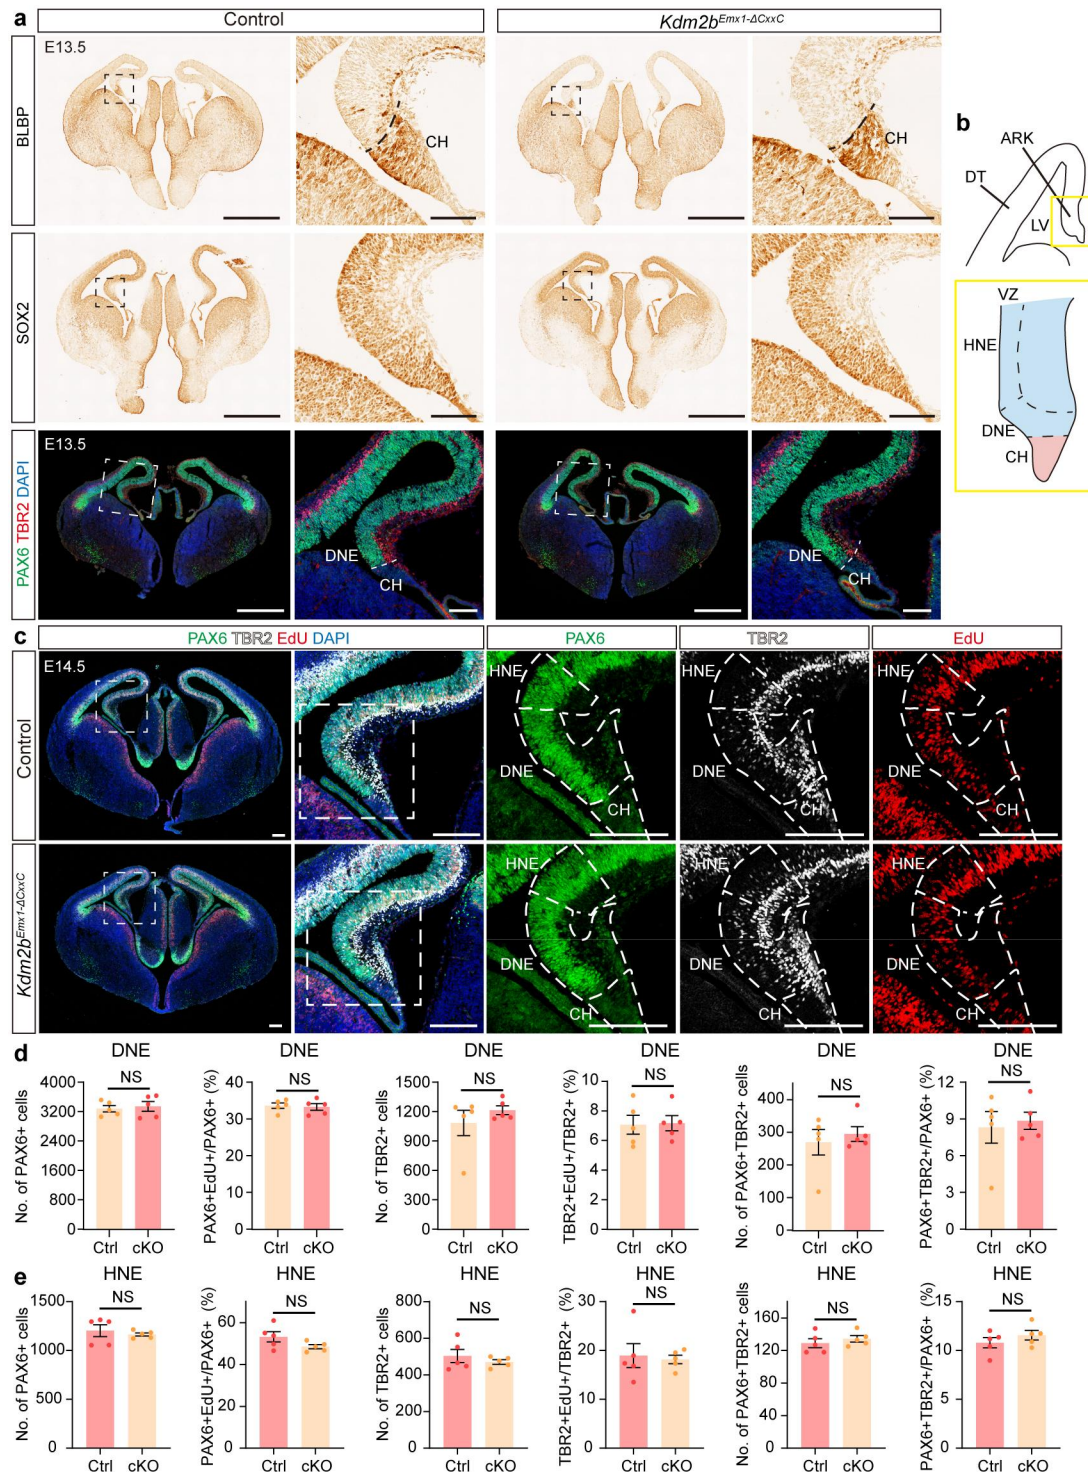

**Supplementary Figure 6**

**Supplementary Fig. 6. Unaltered neural progenitor domains in *Kdm2b<sup>Emx1-ΔCxxC</sup>* hippocampal primordia.**

**a** Immunohistochemical staining for BLBP (top) and SOX2 (middle). Bottom, immunofluorescent staining for PAX6 (green) and TBR2 (green) on coronal sections of E13.5 control (left) and *Kdm2b<sup>Emx1-ΔCxxC</sup>* (right) brains. Nuclei were

173 labeled with DAPI (blue). Boxed regions were enlarged on the right.

174 **b** The schematic of E13.5 wild-type hippocampus. The yellow box is enlarged  
175 to show the hippocampal primordia, with dashed lines demarcating HNE, DNE  
176 and CH.

177 **c** Triple-labeling of PAX6 (green), TBR2 (white) and EdU (red) on E14.5  
178 control and *Kdm2b*<sup>Emx1-ΔCxxC</sup> brain sections. Pregnant mice were injected with  
179 EdU 2 h before sacrifice. Nuclei were labeled with DAPI (blue). Boxed regions  
180 are enlarged on the right, and single channel fluorescence staining of PAX6,  
181 TBR2 and EdU were shown respectively. Dashed lines indicate HNE, DNE and  
182 CH.

183 **d, e** Quantification of data in (c). Quantification of number of PAX6+, TBR2+,  
184 PAX6+TBR2+ and TBR2+EdU+ cells, and the proportion of  
185 PAX6+EdU+/PAX6+, TBR2+EdU+/TBR2+ and PAX6+TBR2+/PAX6+ in E14.5  
186 control and *Kdm2b*<sup>Emx1-ΔCxxC</sup> DNE (d) and HNE (e).

187 Cartoons in **b** are adapted from Caramello *et al.*<sup>1</sup>. n = 5 for control brains and n  
188 = 5 for *Kdm2b*<sup>Emx1-ΔCxxC</sup> brains. Data are represented as means ± SEM.  
189 Statistical significance was determined using an unpaired two-tailed Student's  
190 t-test (d, e). Scale bars, 1 mm (a, whole brain), 100 μm (a, HP), 200 μm (c).  
191 CH, cortical hem; LV, lateral ventricle; DT, dorsal telencephalon; ARK,  
192 archicortex; HNE, hippocampal neuroepithelium; DNE, dentate  
193 neuroepithelium; VZ, ventricular zone.

194

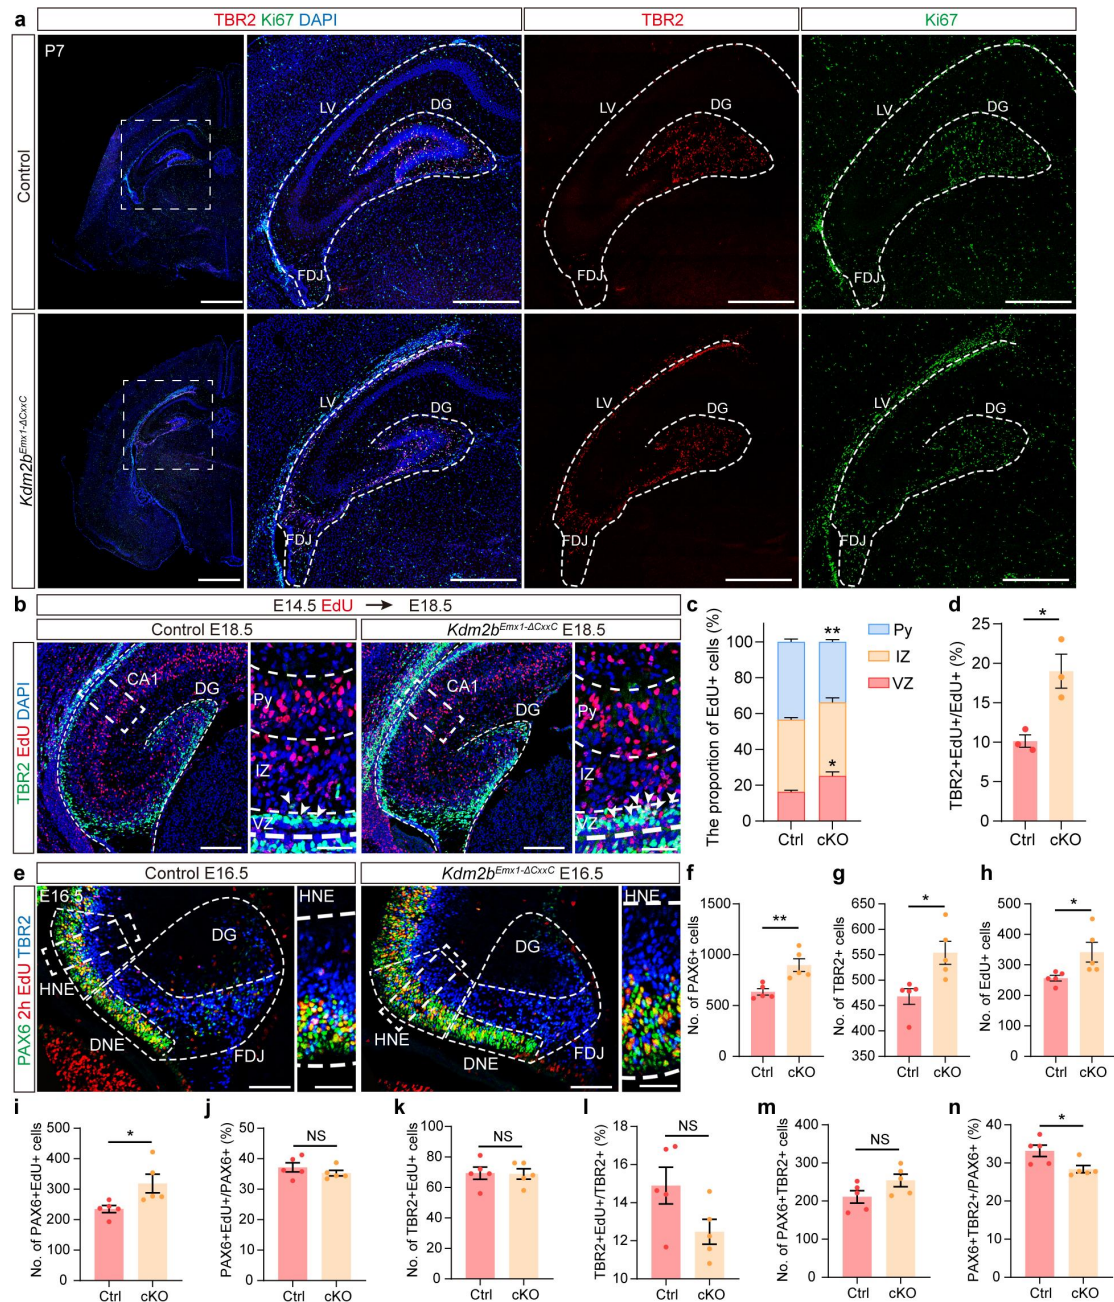

Supplementary Figure 7

195

196 **Supplementary Fig. 7. Ablation of the KDM2B-CxxC blocked**  
 197 **neurogenesis in the CA region.**

198 **a** Double-labeling of TBR2 (red) and Ki67 (green) on P7 coronal section of  
 199 control and *Kdm2b<sup>Emx1-ΔCxxC</sup>* brains. Nuclei were labeled with DAPI (blue).  
 200 Boxed regions are enlarged on the right, and single channel fluorescence  
 201 staining of TBR2 and Ki67 were shown respectively. Dashed lines outline the  
 202 hippocampi.

203 **b** EdU was administrated at E14.5 and double labeling of TBR2 and EdU was

204 performed on E18.5 coronal sections. Boxed regions were enlarged on the  
205 right. Dashed lines outline the hippocampi and distinguish three layers of CA1:  
206 VZ, IZ, Py.

207 **c** The relative location of EdU+ cells in VZ, IZ, Py were quantified.

208 **d** Quantification of the proportion of TBR2+EdU+/EdU+ in control and  
209 *Kdm2b<sup>Emx1-ΔCxxC</sup>* CA1.

210 **e** Triple-labeling of PAX6 (green), TBR2 (blue) and EdU (red, 2h labeling) on  
211 E16.5 control and *Kdm2b<sup>Emx1-ΔCxxC</sup>* brain sections. Boxed regions (HNE) were  
212 enlarged on the right. Dashed lines outline the hippocampi and distinguish  
213 HNE, DNE, FDJ and DG.

214 **f-h** Quantification of PAX6+ (**f**), TBR2+ (**g**) and EdU+ (**h**) cells in the HNE.

215 **i, k, m** Quantification of PAX6+EdU+ (**i**), TBR2+EdU+ (**k**) and PAX6+TBR2+  
216 (**m**) cells in the HNE.

217 **j, l, n** Quantification of the proportion of PAX6+EdU+/PAX6+ (**j**),  
218 TBR2+EdU+/TBR2+ (**l**) and PAX6+TBR2+/PAX6+ (**n**) in the HNE.

219 n = 3 for control brains and n = 3 for *Kdm2b<sup>Emx1-ΔCxxC</sup>* brains in (**c, d**). n = 5 for  
220 control brains and n = 5 for *Kdm2b<sup>Emx1-ΔCxxC</sup>* brains in (**f-n**).

221 Data are represented as means ± SEM. Statistical significance was  
222 determined using an unpaired two-tailed Student's t-test (**d, f-n**), or using  
223 two-way ANOVA followed by by Tukey's multiple comparisons test (**c**). \*P <  
224 0.05, \*\*P < 0.01, NS, not significant. Scale bars, 1 mm (**a**, whole brain), 100  
225 μm (**a**, HP), 200 μm (**b** left, **e** left), 50 μm (**b** right), 40 μm (**e** right). DG, dentate  
226 gyrus; VZ, ventricular zone; IZ, intermediated zone; Py, pyramidal cell layer of  
227 the hippocampus; HNE, hippocampal neuroepithelium; DNE, dentate  
228 neuroepithelium; FDJ, fimbriodentate junction.

229

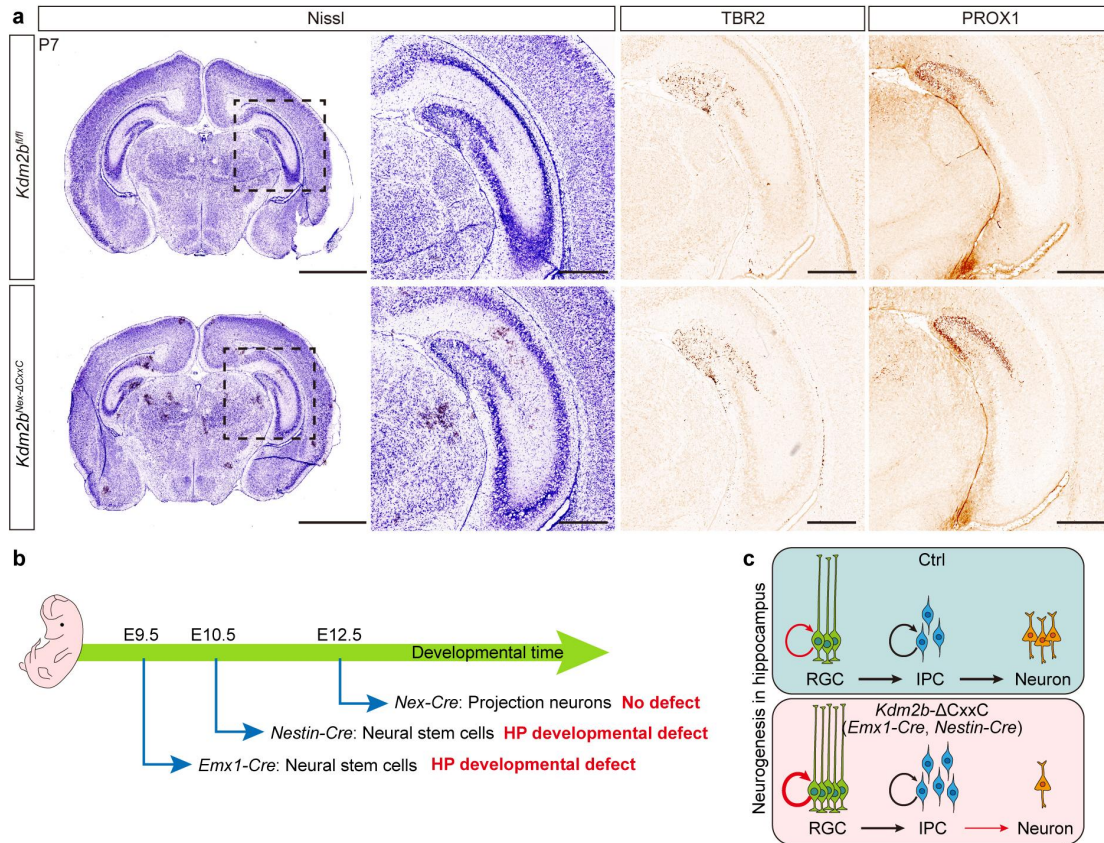

**Supplementary Figure 8**

**Supplementary Fig. 8. Abnormal neuronal differentiation is not responsible for hippocampal hypoplasia caused by loss of KDM2B-CxxC.**

**a** Nissl staining, and immunohistochemical staining of TBR2 and PROX1 on coronal sections of P7 control and *Kdm2b<sup>Nex-ΔCxxC</sup>* brains.

**b** The schematic diagram summarizing expression profiles of three Cre lines, as well as hippocampal phenotypes of respective cKO mice.

**c** The diagram showing aberrant neurogenesis during hippocampal development of *Kdm2b<sup>Emx1-ΔCxxC</sup>* and *Kdm2b<sup>Nestin-ΔCxxC</sup>* mice: a bigger RGC pool with more IPCs produced, but differentiation of IPCs toward neurons was compromised.

Scale bars, 2 mm (**a**, whole brain), 500 μm (**a**, HP). LV, lateral ventricle; FDJ, fimbriodentate junction; DG, Dentate gyrus; RGC, Radial glia cells; IPC, Intermediate progenitor cell.



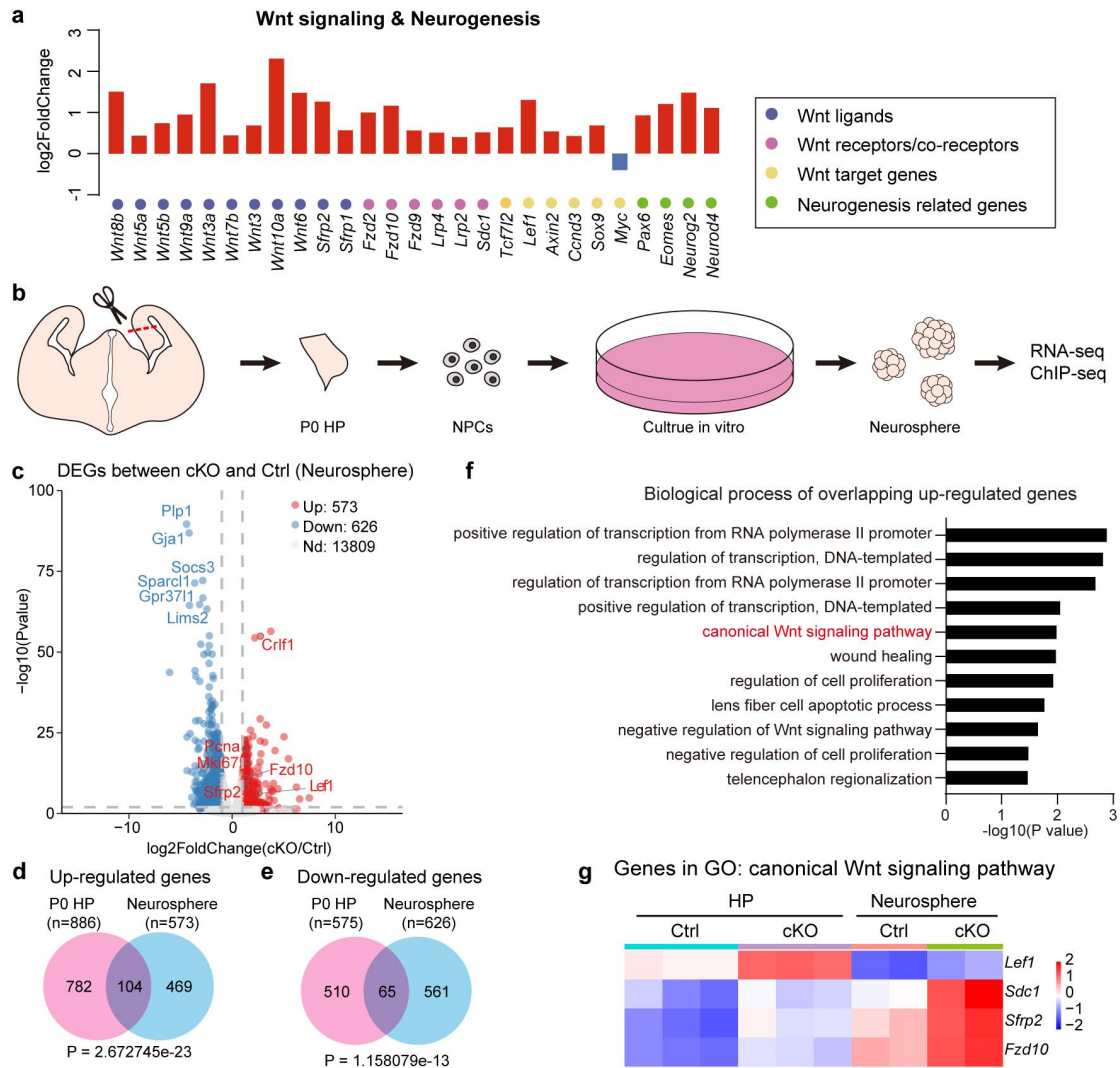

## Supplementary Figure 9

246

247 **Supplementary Fig. 9. RNA-seq of neurospheres derived from P0 cKO**  
 248 **hippocampi showed activation of the Wnt signaling pathway.**

249 **a** Histograms showing the log-fold change of significantly up- or  
 250 down-regulated genes in *Kdm2b<sup>Emx1-ΔCxxC</sup>* (cKO) hippocampi.

251 **b** The schematic diagram: hippocampal tissue was collected from P0 brain and  
 252 digested into single-cell suspensions. After cultured *in vitro* for three  
 253 generations, neurospheres were subjected to RNA-seq and ChIP-seq  
 254 analyses.

255 **c** The volcano plot of genes up-regulated (red) and down-regulated (blue) in  
 256 P0 *Kdm2b<sup>Emx1-ΔCxxC</sup>* (cKO) neurospheres compared to controls.

257 **d** Overlapping up-regulated genes (104) of P0 HP and neurospheres.

258 **e** Overlapping down-regulated genes (65) of P0 HP and neurospheres.  
259 **f** GO analysis of the biological process of overlapping up-regulated genes in  
260 *Kdm2b<sup>Emx1-ΔCxxC</sup>* (cKO) neurospheres revealed terms related to canonical Wnt  
261 signaling pathways (red).  
262 **g** The heat map of genes in GO in (f): canonical Wnt signaling pathway of P0  
263 HP and neurospheres.  
264

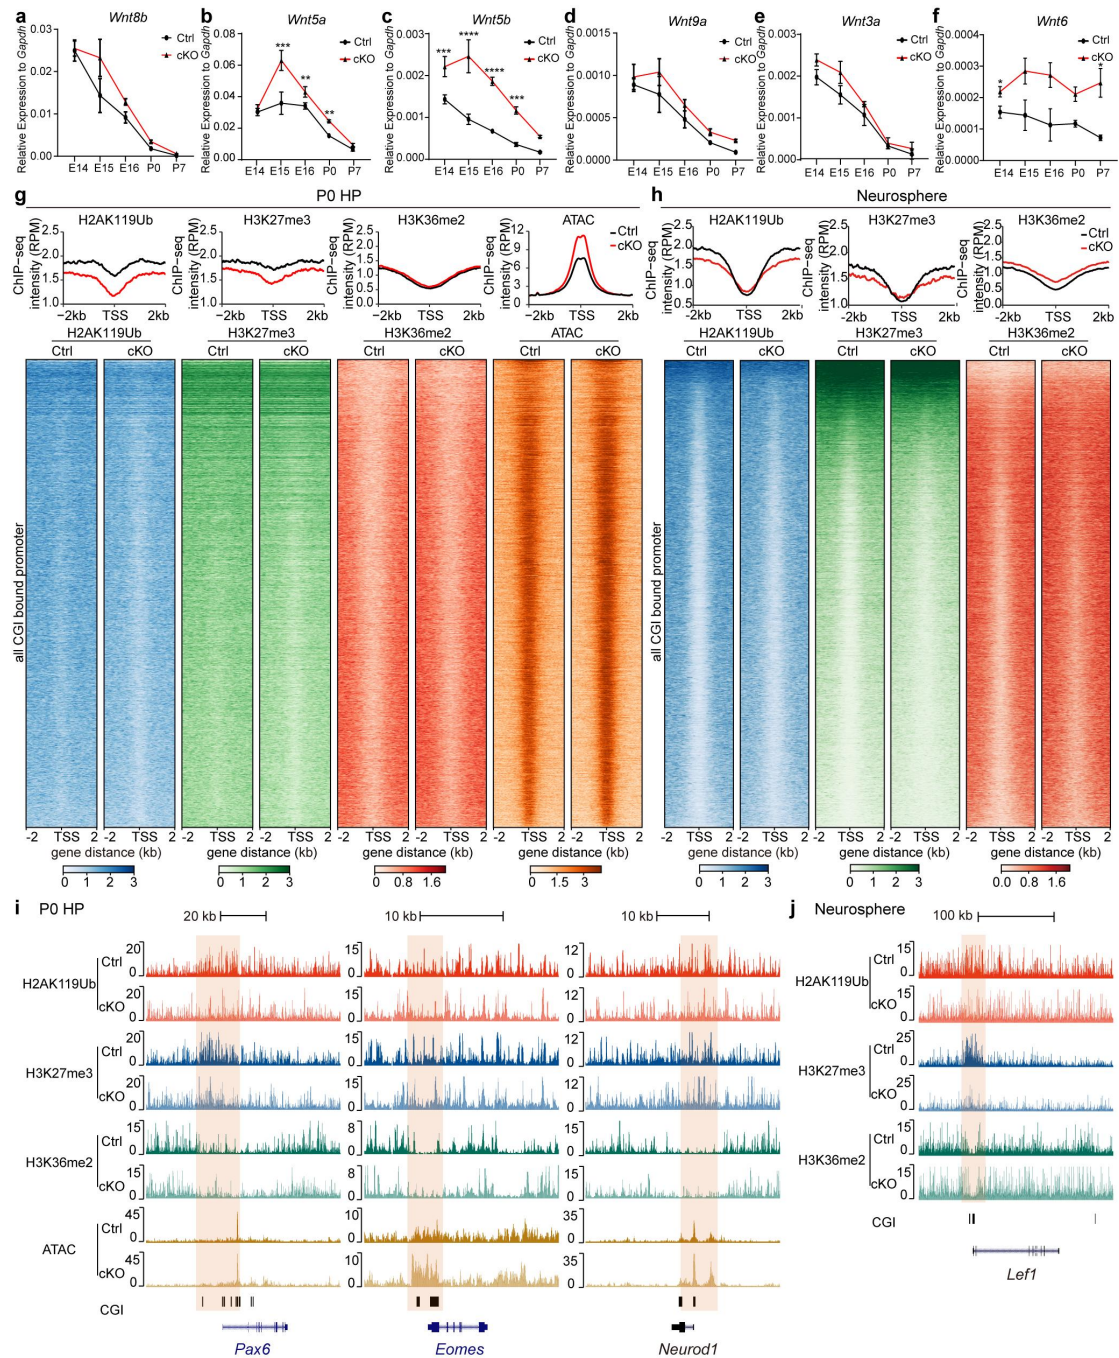

Supplementary Figure 10

Supplementary Fig. 10. KDM2B epigenetically silences components of Wnt signaling genes in developing hippocampi.

a-f RT-qPCR showing relative expressions of *Wnt8b*, *Wnt5a*, *Wnt5b*, *Wnt9a*, *Wnt3a* and *Wnt6* in control (black lines) and *Kdm2b*<sup>Emx1-ΔCxxC</sup> (red lines) hippocampi of indicated developmental stages (E14.5, E15.5, E16.5, P0 and P7).

g Line charts (top) and heatmaps (bottom) showing H2AK119ub, H3K27me3,

273 H3K36me2, and ATAC-seq signals in control and *Kdm2b*<sup>Emx1-ΔCxxC</sup> (cKO)  
274 hippocampi at all CGI-associated promoters. Colors represent ChIP-seq RPM  
275 (reads per million), and rows were ranked by ChIP-seq signals in control  
276 H2AK119ub. Line charts on the top of each set of heatmap showing average  
277 signals, with control in black and *Kdm2b*<sup>Emx1-ΔCxxC</sup> (cKO) in red.

278 **h** Line charts (top) and heatmaps (bottom) showing H2AK119ub, H3K27me3  
279 and H3K36me2 signals in control and *Kdm2b*<sup>Emx1-ΔCxxC</sup> (cKO) neurospheres at  
280 all CGI-associated promoters.

281 **i** The UCSC genome browser view of H2AK119ub, H3K27me3 and  
282 H3K36me2 enrichment and ATAC-seq signal in P0 control and  
283 *Kdm2b*<sup>Emx1-ΔCxxC</sup> (cKO) hippocampi at *Pax6*, *Eomes* and *Neurod1*. CGIs were  
284 shown as black columns on the bottom. Colored regions marked enrichment  
285 differences between control and cKO.

286 **j** The UCSC genome browser view of H2AK119ub, H3K27me3 and  
287 H3K36me2 enrichment in control and *Kdm2b*<sup>Emx1-ΔCxxC</sup> (cKO) neurospheres at  
288 *Lef1*. CGIs were shown as black columns on the bottom. Colored regions  
289 marked enrichment differences between control and cKO.

290 Data are represented as means ± SEM. Statistical significance was  
291 determined using two-way ANOVA followed by Sidak's multiple comparisons  
292 test (**a-f**). \*P < 0.05, \*\*P < 0.01, \*\*\*P < 0.001, and \*\*\*\*P < 0.0001.

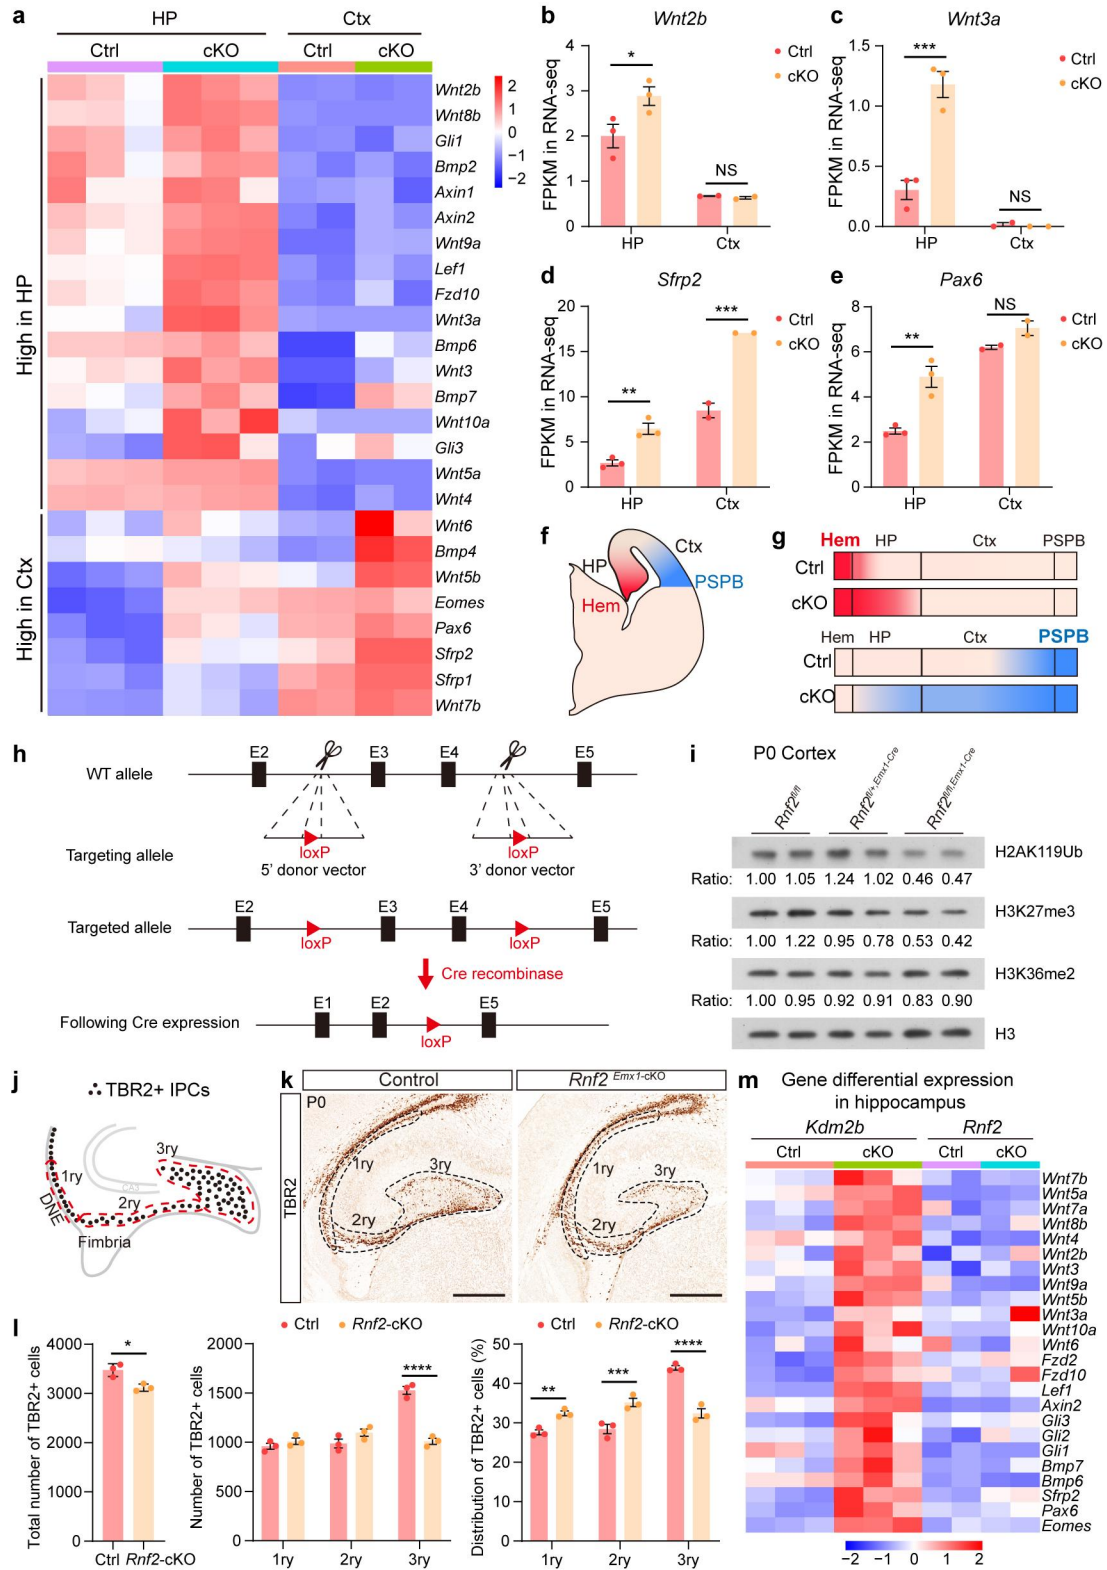

### Supplementary Figure 11

293

294 **Supplementary Fig. 11. Loss of Ring1B did not cause accumulation of**  
 295 **neural progenitors.**

296 **a** The heat map of hem and PSPB (pallial-subpallial boundary) genes of P0 HP

297 and cortex.

298 **b-e** Representative FPKM value of RNA-seq in **(a)**: *Wnt2b* **(b)**; *Wnt3b* **(c)**;  
299 *Sfrp2* **(d)**; *Pax6* **(e)**.

300 **f, g** Schematic diagram of altered hem and PSPB signals in P0  
301 *Kdm2b<sup>Emx1-ΔCxxC</sup>* (cKO) brain.

302 **h** Schematic representation of the *Rnf2* genomic structure (top), targeting  
303 allele (middle) and targeted allele (bottom). Exon 3-4 is flanked by *loxP* sites  
304 and will be excised after mating with Cre-recombinase-expressing mice.

305 **i** Immunoblots of H2AK119ub, H3K27me3, H3K36me2 and H3 using extracts  
306 of P0 *Rnf2<sup>fl/fl</sup>*, *Rnf2<sup>fl/+</sup>, Emx1-Cre* and *Rnf2<sup>fl/fl</sup>, Emx1-Cre* neocortices. The relative  
307 expression levels of indicated modifications were shown under each blot.

308 **j-l** Immunohistochemical staining of TBR2 **(k)** on coronal sections of P0 control  
309 (left) and *Rnf2<sup>Emx1-cKO</sup>* (right) hippocampi. Distribution of TBR2+ cells along the  
310 three matrices, where dashed lines indicate areas considered as 1ry, 2ry, and  
311 3ry matrix **(l)**. n = 3 for control brains, n = 3 for *Rnf2<sup>Emx1-cKO</sup>* brains.

312 **m** The heat maps of Wnt signaling and neurogenesis related genes in the  
313 hippocampus of P0 *Kdm2b-cKO* and *Rnf2-cKO* mice.

314 Data are represented as means ± SEM. Statistical significance was  
315 determined using an unpaired two-tailed Student's t-test **(i, left)** or using  
316 two-way ANOVA followed by Sidak's multiple comparisons test **(b-e, i, middle**  
317 **and right)**. \*P < 0.05, \*\*P < 0.01, \*\*\*P < 0.001, \*\*\*\*P < 0.0001, and "NS"  
318 indicates no significance. Scale bars, 300 μm **(k)**. HP, hippocampus; Ctx,  
319 cortex; PSPB, pallial-subpallial boundary; DNE, dentate neuroepithelium; 1ry,  
320 primary matrix; 2ry, secondary matrix; 3ry, tertiary matrix.

321

**Supplementary Tables****Supplementary Table 1. Abbreviations list**

|      |                                         |
|------|-----------------------------------------|
| HP   | hippocampus                             |
| CA   | Cornu Ammonis                           |
| DG   | dentate gyrus                           |
| Ctx  | cortex                                  |
| Th   | Thalamus                                |
| LV   | lateral ventricle                       |
| F    | fimbria                                 |
| DMS  | dentate migratory stream                |
| FDJ  | fimbriodentate junction                 |
| HF   | hippocampal fissure                     |
| 1ry  | primary matrix                          |
| 2ry  | secondary matrix                        |
| 3ry  | tertiary matrix                         |
| HNE  | hippocampal neuroepithelium             |
| DNE  | dentate neuroepithelium                 |
| CH   | cortical hem                            |
| RGC  | Radial glia cells                       |
| IPC  | Intermediate progenitor cell            |
| DT   | dorsal telencephalon                    |
| ARK  | archicortex                             |
| Sub  | Subiculum                               |
| VZ   | ventricular zone                        |
| IZ   | intermediated zone                      |
| Py   | pyramidal cell layer of the hippocampus |
| CGI  | CpG island                              |
| PSPB | pallial-subpallial boundary             |

**Supplementary Table 2. ISH primers used in this study**

|                         |                        |
|-------------------------|------------------------|
| <i>Kdm2b-CxxC-ISH-F</i> | GTCGGCCTAAGGGCAAGTT    |
| <i>Kdm2b-CxxC-ISH-R</i> | CACACACAAGGCACACGG     |
| <i>Lef1-ISH-F</i>       | AGAGAACCCTGATGAAGGAA   |
| <i>Lef1-ISH-R</i>       | CTTCCTCTTCTTCTTCTTGCCA |
| <i>Sfrp2-ISH-F</i>      | AGCAACTGCAAGCCCATC     |
| <i>Sfrp2-ISH-R</i>      | ATGGAGAGAAGCCACCCC     |

**Supplementary Table 3. RT-qPCR primers used in this study**

|                          |                         |
|--------------------------|-------------------------|
| <i>Kdm2b-JmjC-qPCR-F</i> | AACCTTGGCTTTGTACGAGGAGT |
| <i>Kdm2b-JmjC-qPCR-R</i> | CACGTTGAAGCTATGCAGGATG  |
| <i>Kdm2b-CxxC-qPCR-F</i> | GTGGAGAGTGCCACTTTTGC    |
| <i>Kdm2b-CxxC-qPCR-R</i> | CACTGTGTCCTCCTTCCCTG    |

|                         |                        |
|-------------------------|------------------------|
| <i>Kdm2b-LRR-qPCR-F</i> | GCTCATGGATCGCTGTCTCA   |
| <i>Kdm2b-LRR-qPCR-R</i> | AGGCGCAGCTCTACAATGTT   |
| <i>Wnt7b-qPCR-F</i>     | GCTGGTCTCCGTCTATTGCC   |
| <i>Wnt7b-qPCR-R</i>     | TCACAATGATGGCATCGGGT   |
| <i>Wnt3-qPCR-F</i>      | GGGCCAGCAGTACACATCTCT  |
| <i>Wnt3-qPCR-R</i>      | CAGGCTGTTCATCTATGGTGGT |
| <i>Wnt10a-qPCR-F</i>    | TGAACACCCGGCCATACTTC   |
| <i>Wnt10a-qPCR-R</i>    | CATGTTCTCCATCACCGCCT   |
| <i>SFRP2-qPCR-F</i>     | GAAGAAATCCGTGCTGTGGC   |
| <i>SFRP2-qPCR-R</i>     | TGCGCTTGAACCTCTCTCTGG  |
| <i>Wnt8b-qPCR-F</i>     | CCCGTGTGCGTTCTTCTAGT   |
| <i>Wnt8b-qPCR-R</i>     | CAACGGTCCCAAGCAAAGT    |
| <i>Wnt5a-qPCR-F</i>     | GTGATGCAAATAGGCAGCCG   |
| <i>Wnt5a-qPCR-R</i>     | AGCGTGGATTCGTTCCCTTT   |
| <i>Wnt5b-qPCR-F</i>     | GTGCCAACACCAGTTTTCGAC  |
| <i>Wnt5b-qPCR-R</i>     | CTCTCGGGCATCCACAAACT   |
| <i>Wnt9a-qPCR-F</i>     | AACAACCTCGTGGGTGTGAAG  |
| <i>Wnt9a-qPCR-R</i>     | CTCTCCAGTGGCTTCATTGGT  |
| <i>Wnt3a-qPCR-F</i>     | TCTGCCATGAACCGTCACAA   |
| <i>Wnt3a-qPCR-R</i>     | GTACGTGTAACGTGGCCTCA   |
| <i>Wnt6-qPCR-F</i>      | GAGACGATGTGGACTTCGGG   |
| <i>Wnt6-qPCR-R</i>      | AGCCCATGGCACTTACTC     |

325

**Supplementary Table 4. Plasmid construction primers used in this study**

|                      |                                                                |
|----------------------|----------------------------------------------------------------|
| <i>Wnt3a-F-EcoR1</i> | CATCATTTTGGCAAAGAATTCGCCACCATGGCTCCTC<br>TCGGATACCTCTTAGTGCTC  |
| <i>Wnt3a-R-Not1</i>  | ATGGTCTTTGTAGTCGCGGCCGCCCTTGCAGGTGTG<br>CACGTCATAGACAC         |
| <i>Wnt5a-F-EcoR1</i> | CATCATTTTGGCAAAGAATTCGCCACCATGAAGAAGC<br>CCATTGGAATATTAAGCCCGG |
| <i>Wnt5a-R-Not1</i>  | ATGGTCTTTGTAGTCGCGGCCGCCCTTGCACACGAA<br>CTGATCCACAATCTCC       |
| <i>Wnt5b-F-EcoR1</i> | CATCATTTTGGCAAAGAATTCGCCACCATGCCCAGC<br>CTGCTGCTGGTGGTTCGTGGCA |
| <i>Wnt5b-R-Not1</i>  | ATGGTCTTTGTAGTCGCGGCCGCCCTTACAGACATA<br>CTGGTCCACAACCTCGGT     |
| <i>Wnt7b-F-EcoR1</i> | CATCATTTTGGCAAAGAATTCGCCACCATGCACAGAA<br>ACTTTCGAAAGTGGATCTTTT |
| <i>Wnt7b-R-Kpn1</i>  | ATGGTCTTTGTAGTCGGTACCTCACTTGCAGGTGAA<br>GACCTCGG               |
| <i>Wnt8b-F-EcoR1</i> | CATCATTTTGGCAAAGAATTCGCCACCATGCTTCCCA<br>TCTCTCAATGTTTGGAGTCGC |
| <i>Wnt8b-R-Kpn1</i>  | ATGGTCTTTGTAGTCGGTACCTTAGGAGTTCTTTCCC                          |



|               |                                                        |
|---------------|--------------------------------------------------------|
|               | GGTTTGTG                                               |
| SFRP2-F-EcoR1 | CATCATTTTTGGCAAAGAATTCGCCACCATGCCGCGG<br>GGCCCTGCCTCGC |
| SFRP2-R-Kpn1  | ATGGTCTTTGTAGTCGGTACCCTAGCATTGCAGCTTG<br>CGGATGCTG     |

---

326

327

## 328 **Supplementary Methods**

329

### 330 **Mice and genotyping**

331 Mice with conditional deletion of *Kdm2b-CxxC* were obtained by first  
 332 crossing *Kdm2b<sup>fl/fl</sup>* (generated by Applied Stem Cell) females with *Emx1-Cre*  
 333 (Jackson Laboratories, stock number 005628), *Nestin-Cre* (Jackson  
 334 Laboratories, stock number 003771) or *Nex-Cre* males [*Neurod6<sup>tm1(cre)Kan</sup>*,  
 335 MGI:2668659]. *Emx1-Cre; Kdm2b<sup>fl/+</sup>*, *Nestin-Cre; Kdm2b<sup>fl/+</sup>* or *Nex-Cre;*  
 336 *Kdm2b<sup>fl/+</sup>* males were crossed with *Kdm2b<sup>fl/fl</sup>* females to obtain conditional  
 337 knockout mice (*Kdm2b<sup>Emx1-ΔCxxC</sup>*, *Kdm2b<sup>Nestin-ΔCxxC</sup>*, *Kdm2b<sup>Nex-ΔCxxC</sup>*). *Kdm2b<sup>fl/+</sup>*  
 338 and *Kdm2b<sup>fl/fl</sup>* were phenotypically indistinguishable from each other, and used  
 339 as controls. The primer set forward 5'- cctgtagtccttggtatttctggc-3'/reverse 5' -  
 340 cccaactgccccttaggccg-3' was used for mice genotyping, and band sizes for  
 341 *Kdm2b<sup>fl/+</sup>* mice are 364 bp (WT allele) and 404 bp (targeted allele with 5' loxP).  
 342 Forward 5'- cctgttacgtatagccgaaa-3'/reverse 5'- ctagcgccgtaaataatc-3' was  
 343 used for *Emx1-Cre*, *Nestin-Cre* and *Nex-Cre* genotyping with band size 319 bp  
 344 (Cre allele).

345

346 To analyze adult neurogenesis, the *Nestin-CreERT2* (Jackson  
 347 Laboratories, stock number 016261) and *Kdm2b<sup>fl/fl</sup>* mice were crossed to  
 348 generate *Nestin-CreERT2; Kdm2b<sup>fl/+</sup>* animals. *Nestin-CreERT2; Kdm2b<sup>fl/+</sup>*  
 349 mice were further crossed with *Kdm2b<sup>fl/fl</sup>* mice to obtain homozygous  
 350 *Kdm2b<sup>NestinCreERT2-ΔCxxC</sup>* animals, which were used for the experiment. Forward  
 351 5'- gaccaggttcgttcaactca-3'/reverse 5'- caagtaggagcaaacagtagc-3' was used  
 352 for *Nestin-CreERT2* genotyping with band size 993 bp (CreERT2 allele).

353

354 To verify the activity of *Nestin-CreERT2* in hippocampal SGZ and the  
355 expression profile of *Emx1-Cre* and *Nestin-Cre* in developing hippocampus,  
356 we constructed *Nestin-CreERT2;Ai14* (Rosa-CAG-LSL-tdTomato-WPRE),  
357 *Emx1-Cre;Ai14* and *Nestin-Cre;Ai14* mice. The primer sets forward 5'-  
358 aaggagctgcagtgaggta-3'/reverse 5' - ccgaaaatctgtgggaagtc-3' and forward 5'-  
359 ggcatataagcagcgtatcc-3'/reverse 5' - ctgttctgtacggcatgg-3' were used for *Ai14*  
360 mice genotyping, and band sizes for *Ai14*<sup>+/-</sup> mice are 297 bp (WT allele) and  
361 196 bp (*Ai14* allele).

362

363 BAT-Gal mice were kind gifts from Dr. Junlei Chang (Jackson Lab, stock  
364 number 005317). To explore the Wnt signaling pathway in *Kdm2b*<sup>*Emx1-ΔCxxC*</sup>  
365 mice, the BAT-Gal and *Kdm2b*<sup>*fl/fl*</sup> mice were crossed to generate *Kdm2b*<sup>*fl/+*</sup>;  
366 BAT-Gal animals. *Emx1-Cre; Kdm2b*<sup>*fl/+*</sup> mice were further crossed with  
367 *Kdm2b*<sup>*fl/+*</sup>; BAT-Gal mice to obtain *Kdm2b*<sup>*Emx1-ΔCxxC*</sup>; BAT-Gal animals, which  
368 were used for the experiment. The primer set forward  
369 5'-atcctctgcatggtcaggtc-3'/reverse 5'-cgtggcctgattcattcc-3' was used for  
370 BAT-Gal mice with band size 315 bp (LacZ allele).

371

372 Mice with conditional deletion of *Rnf2* were obtained by first crossing  
373 *Rnf2*<sup>*fl/fl*</sup> (purchased from GemPharmatech, Strain NO. T014803) females with  
374 *Emx1-Cre* males (Jackson Laboratories, stock number 005628). The primer  
375 set forward 5'- agctgtggctcctgcgtttcatttc-3'/reverse 5' -  
376 gctcttactgtgtacaaccctagccc-3' was used for *Rnf2*<sup>*fl/+*</sup> mice genotyping, and band  
377 sizes for *Rnf2*<sup>*fl/+*</sup> mice are 289 bp (WT allele) and 391 bp (targeted allele with 5'  
378 loxP).

379

### 380 **Behavior tests**

381 We used 12- to 16-week-old age-matched male mice for all behavioral  
382 tests. Mice were housed (3-5 animals per cage) in standard filter-top cages

383 with access to water and rodent chow at all times, maintained on a 12:12 h  
384 light/dark cycle (09:00-21:00 h lighting) at 22°C, with relative humidity of  
385 50%–60%. All behavioral assays were done blind to genotypes.

386

387 *Open field test.* The test mouse was gently placed near the wall-side of a  
388 length of 50 cm, a width of 50 cm, and a height of 50 cm open-field arena and  
389 allowed to explore freely for 20 min. Only the last 10 min of the movement of  
390 the mouse was recorded by a video camera and analyzed with Ethovision XT  
391 13 (Noldus).

392

393 *Rotarod test.* The test consists of 4 trials per day for 10 days with the rotarod (3  
394 cm in diameter) set to accelerate from 4 rpm to 40 rpm over 5 minutes. The  
395 trial started once mice were placed on the rotarod rotating at 4 rpm in  
396 partitioned compartments. The time for each mouse spent on the rotarod were  
397 recorded. At least 20 min recovery time was allowed between trials. The  
398 rotarod apparatus was cleaned with 70% ethanol and wiped with paper towels  
399 between each trial.

400

401 *Morris water maze.* Mice were introduced into a stainless water-filled circular  
402 tank, which is 122 cm in diameter and 51 cm in height with non-reflective  
403 interior surfaces and ample visual cues. Two principal axes were drawn on the  
404 floor of the tank, each line bisecting the maze perpendicular to one another to  
405 create an imaginary '+'. The end of each line demarcates four cardinal points:  
406 North, South, East and West. To enhance the signal-to-noise ratio, the tank  
407 was filled with water colored with powdered milk. A 10-cm circular plexiglass  
408 platform was submerged 1 cm below the surface of the water in middle of the  
409 southwest quadrant. Mice started the task at fixed points, varied by day of  
410 testing<sup>2</sup>. Four trials were performed per mouse per day with 20 min intervals  
411 for 5 days. Each trial lasted 1 min and ended when the mouse climbed onto  
412 and remained on the hidden platform for 10 s. The mouse was given 20 s rest

413 on the platform during the inter-trial interval. The time taken by the mouse to  
414 reach the platform was recorded as its latency. Times for four trials were  
415 averaged and recorded as a result for each mouse. On day 6, the mouse was  
416 subjected to a single 60-s probe trial without a platform to test memory  
417 retention. The mouse started the trial from northeast, the number of platform  
418 crossings was counted, and the swimming path was recorded and analyzed  
419 using the Ethovision XT 13 (Noldus).

420

421 *Fear conditioning (FC)*. The FC apparatus consisted of a conditioning box (18  
422 × 18 × 30 cm), with a grid floor wired to a shock generator surrounded by an  
423 acoustic chamber and controlled by Ethovision XT 13 (Noldus). On Day 1,  
424 each mouse was placed in the conditioning box for 2 min, and then a pure tone  
425 (80 db) was sounded for 30 s followed by a 2 s foot shock (0.4 mA). Two  
426 minutes later, this procedure was repeated. After the delivery of the second  
427 shock, mice were returned to their home cages. On Day 2, each mouse was  
428 first placed in the fear conditioning chamber containing the exact same context,  
429 but there was no administration of a tone or foot shock. Freezing was analyzed  
430 for 4 min. One hour later, the mice were placed in a new context (containing a  
431 different odor, cleaning solution, floor texture, walls and shape) where they  
432 were allowed to explore for 3 min before being re-exposed to the fear  
433 conditioning tone and freezing was assessed for an additional 3 min. FC was  
434 assessed through the continuous measurement of freezing (complete  
435 immobility), which is the dominant behavioral fear response. Freezing was  
436 measured using the Noldus Ethovision video tracking system (Ethovision XT  
437 13).

438

439 *Forced swimming test*. For the forced swimming test, the test mouse was  
440 placed into a 20 cm height and 17 cm diameter glass cylinder filled with water  
441 to a depth of 10 cm at 22°C. The test continues 6 min and the immobility time  
442 of the last 5 minutes was recorded for further processing.

443

444 *Tail suspension test.* The test mouse was suspended in the middle of a tail  
445 suspension box (55 cm height × 60 cm width × 11.5 cm depth) above the  
446 ground by its tail. The mouse tail was adhered securely to the suspension bar  
447 using adhesive tapes. After 1 min accommodation, the immobility time was  
448 recorded by a video camera and analyzed by Ethovision XT 13 (Noldus).

449

450 *Elevated plus maze test.* The elevated plus maze, made of gray polypropylene  
451 and elevated about 40 cm above the ground, consists of two open arms and  
452 two closed arms (each 9.5 cm wide and 40 cm long). To assess anxiety, the  
453 test mouse was placed in the central square facing an open arm and allowed  
454 to explore freely for 5 min. The time spent in the open arm was analyzed with  
455 the Ethovision XT 13 (Noldus).

456

457

458 **Source Data**

459

460 Source Data of Supplementary Fig 1b

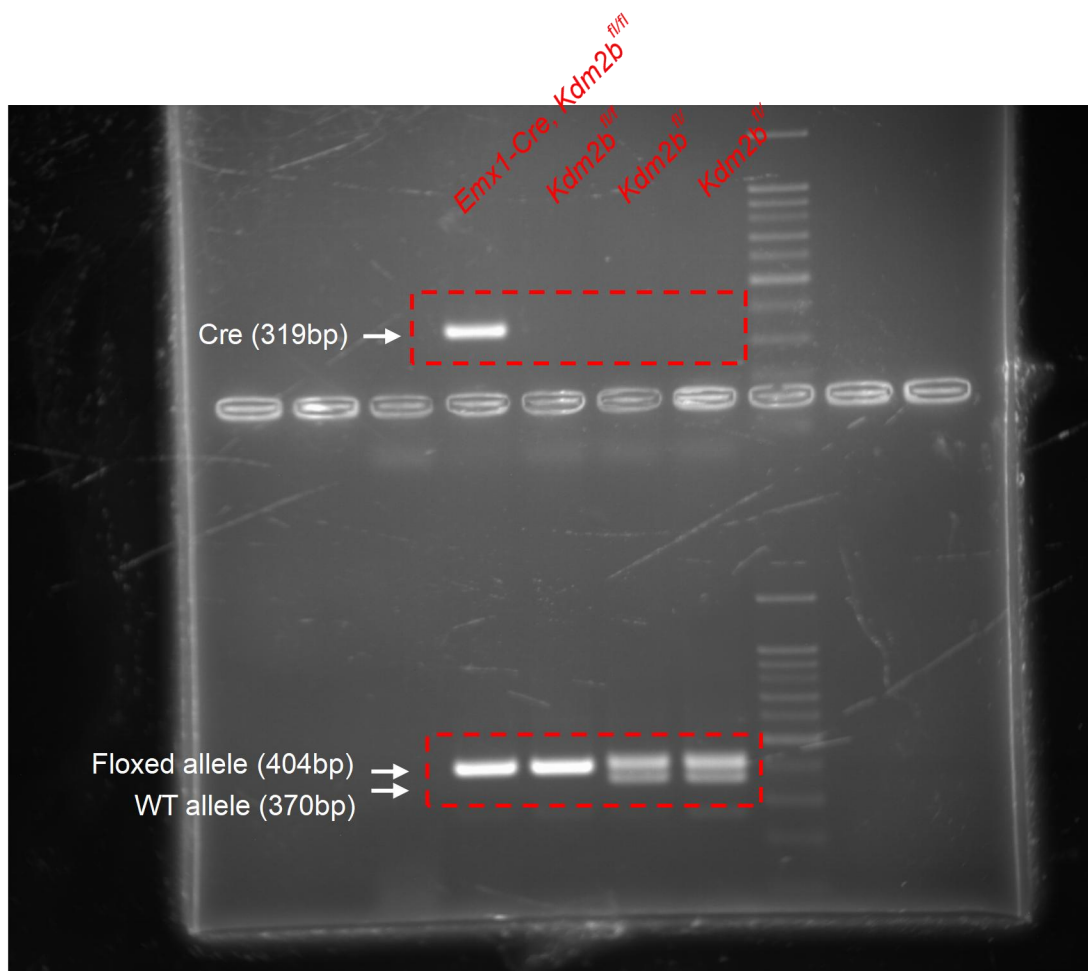

461

462

463 Source Data of Supplementary Fig 1k

464

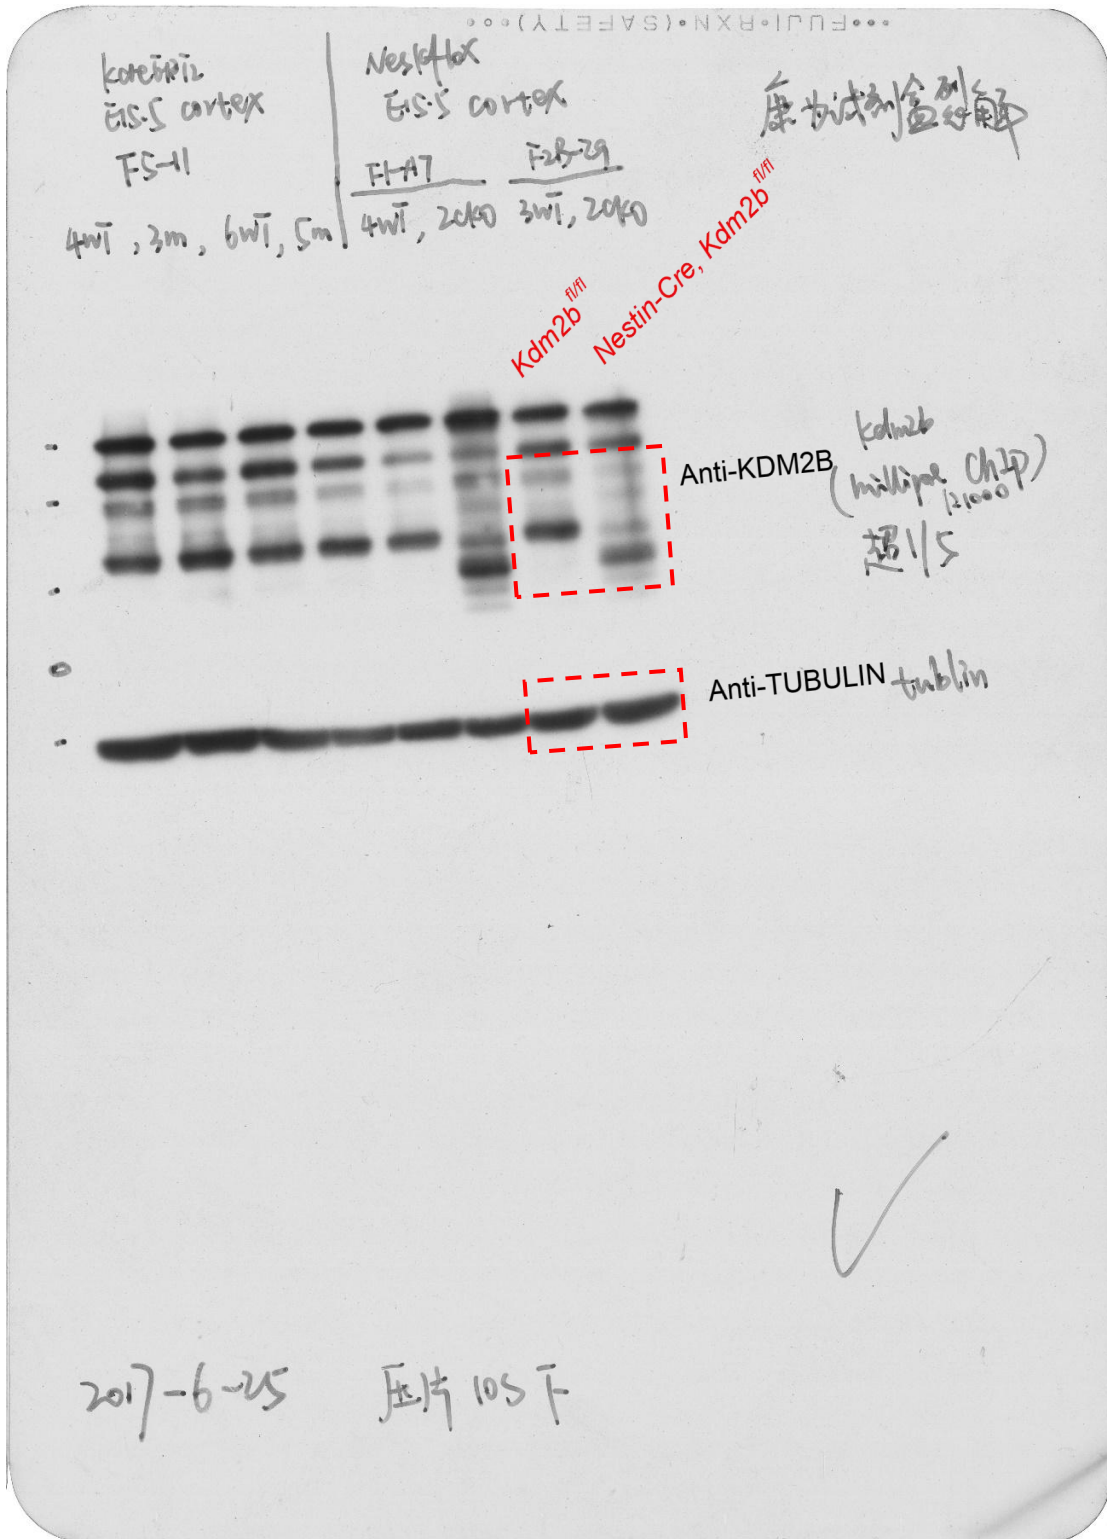

465

466 Source Data of Supplementary Fig 11

467 Anti-KDM2B

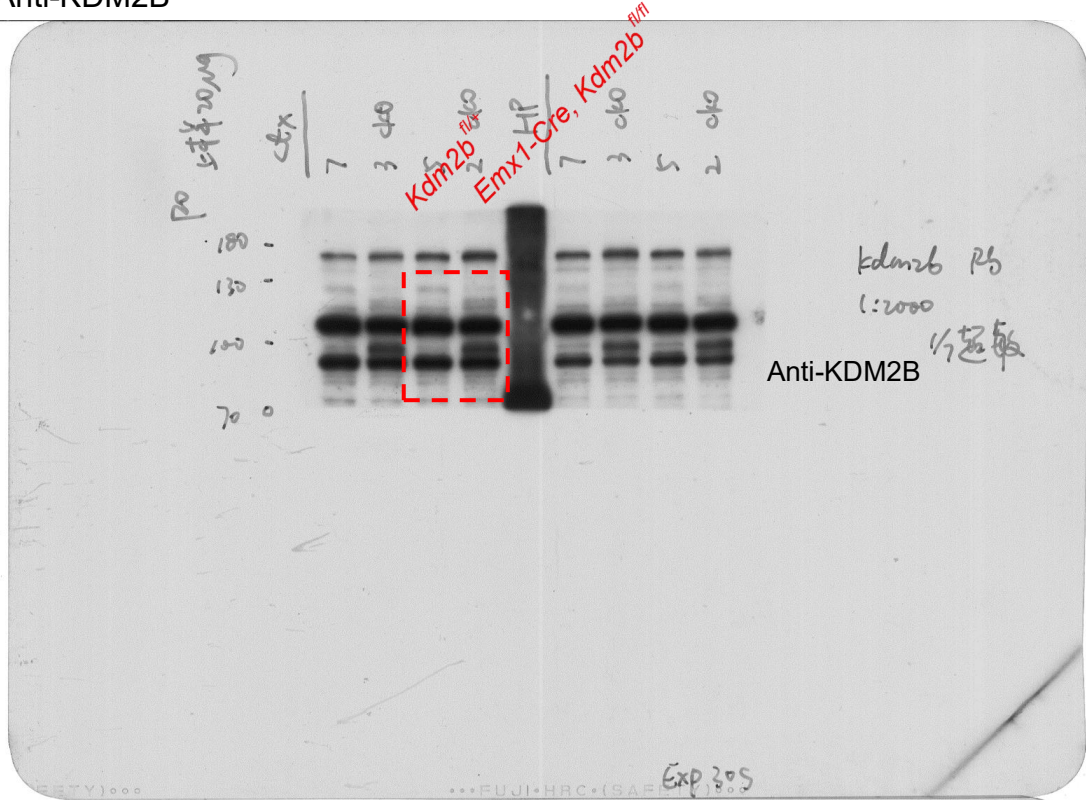

468

469

470 Anti-TUBULIN

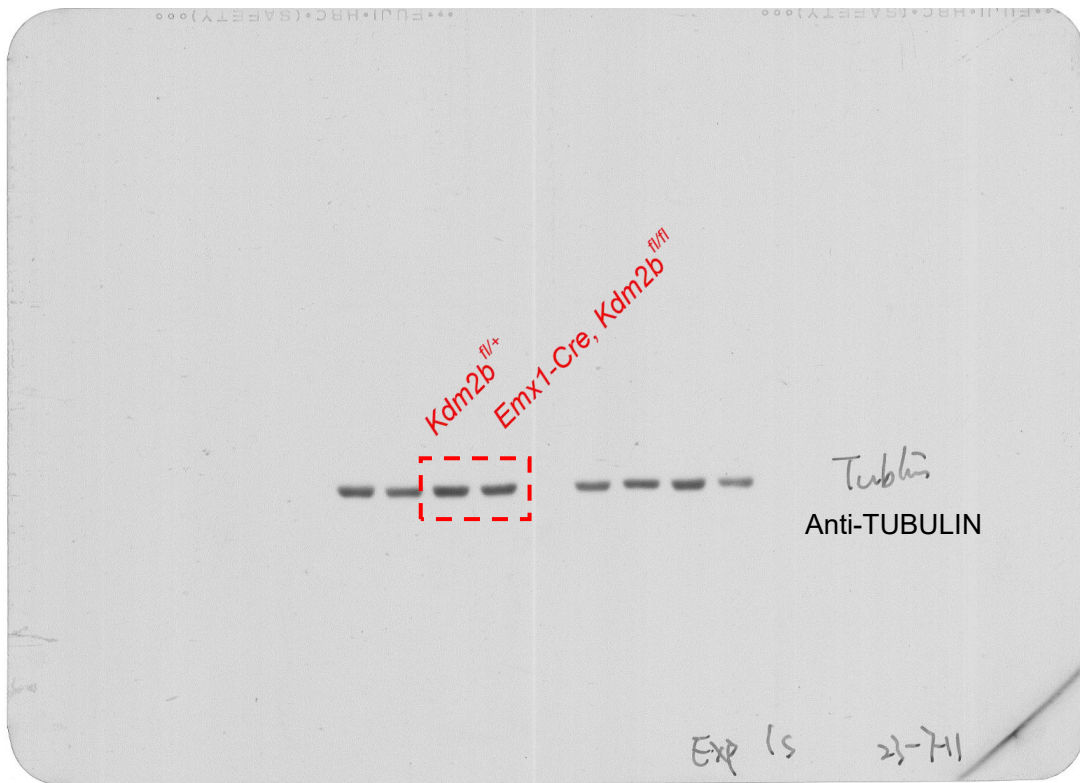

471



472 Source Data of Supplementary Fig 11i

473 Anti-H2AK119ub

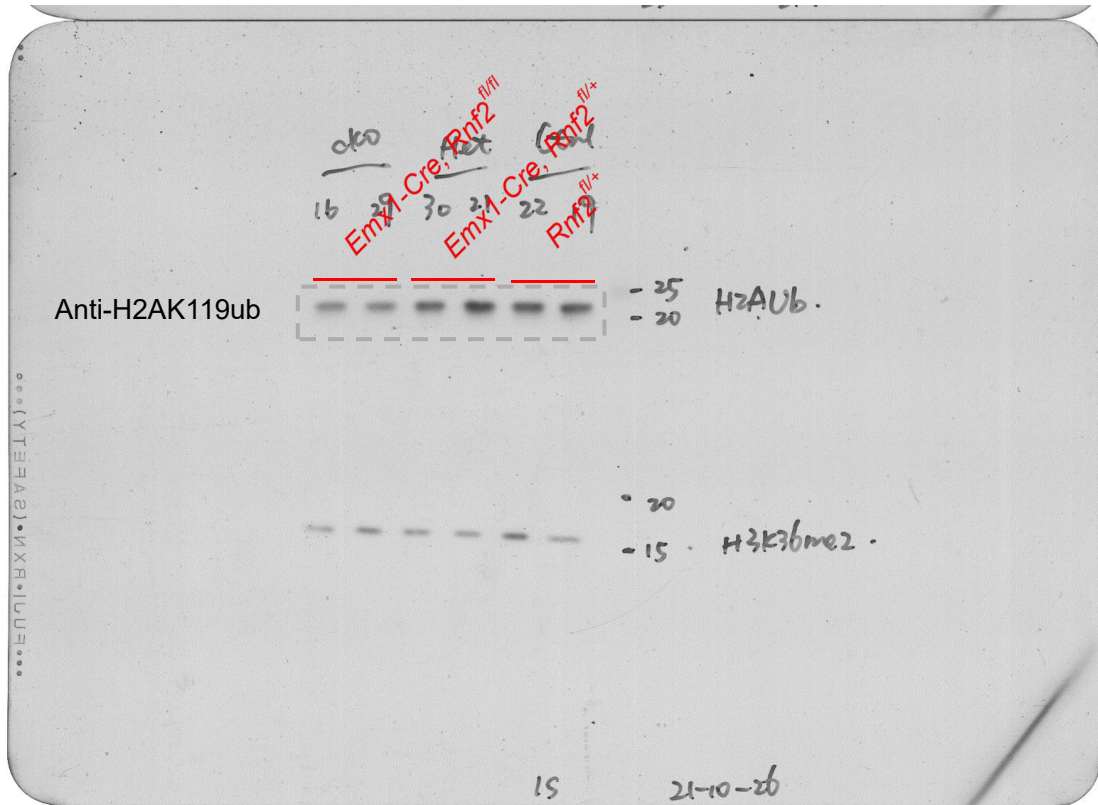

474

475

476 Anti-H3K27me3

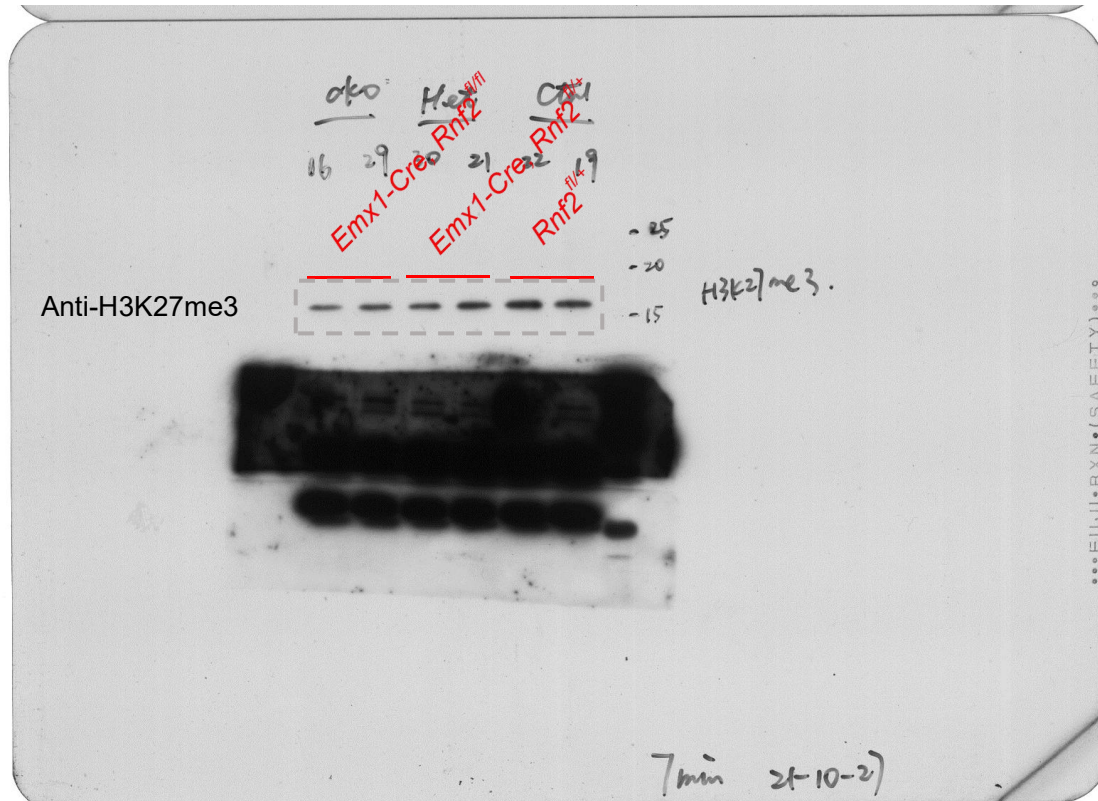

477

478

479 Anti-H3K36me2

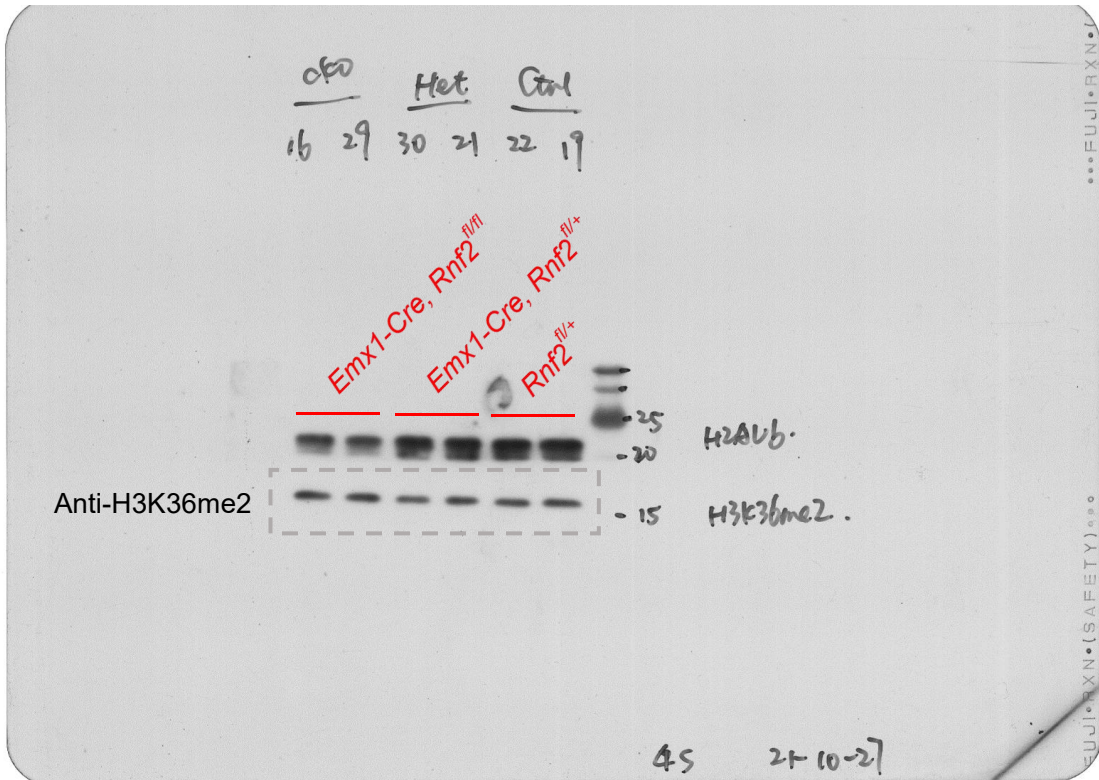

480

481

482 Anti-H3

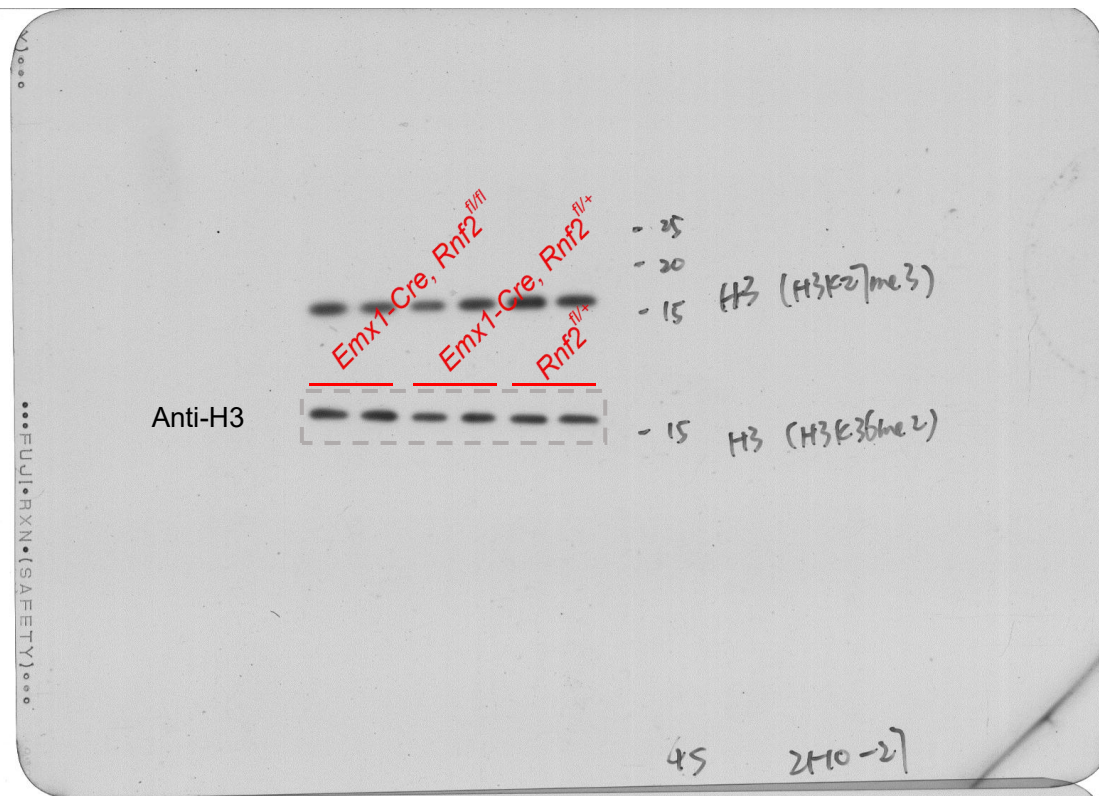

483

484 **Supplementary References**

- 485 1. Caramello A, Galichet C, Rizzoti K, Lovell-Badge R. Dentate gyrus development  
486 requires a cortical hem-derived astrocytic scaffold. *Elife* **10**, (2021).  
487
- 488 2. Vorhees CV, Williams MT. Morris water maze: procedures for assessing spatial and  
489 related forms of learning and memory. *Nat Protoc* **1**, 848-858 (2006).  
490
- 491
